# Supplementary material
Source: Research Square preprint supplement (doi:10.21203/rs.3.rs-9168944/v1)
Supplement: Supplementary file 1 [file 9616b60c5d0ef775a39f058e.docx]

*Supplementary Material*

***Angle‑Resolved Magnetic Chirality Control in a Dy3 Single Molecule Toroic***

Sagar Paul,1,# Zhenhua Zhu,2,3#* Shuting Liu,2 Appu Sunil1, Eufemio Moreno-Pineda,4,5* Jinkui Tang2,3*and Wolfgang Wernsdorfer1,5,*

*1 Physikalisches Institut, Karlsruhe Institute of Technology, D-76131 Karlsruhe, Germany.*

*2State Key Laboratory of Rare Earth Resource Utilization, Changchun Institute of Applied Chemistry, Chinese Academy of Sciences, Changchun 130022, P. R. China.*

*3School of Chemistry and Chemical Engineering, Beijing Institute of Technology, Beijing 102488, P. R. China.*

*4 Universidad de Panamá, Facultad de Ciencias Naturales, Exactas y Tecnología, Depto. de Química-Física, 0824 Panamá, Panamá.*

*5 Institute of Quantum Materials and Technologies (IQMT), Karlsruhe Institute of Technology (KIT), Hermann-von-Helmholtz-Platz 1, D-76344, Eggenstein-Leopoldshafen, Germany.*

*#These authors contributed equally to this work.*

*Contact authors:* [*zhuzh@ciac.ac.cn*](mailto:zhuzh@ciac.ac.cn)*;* [*eufemio.moreno-pineda@kit.edu*](mailto:eufemio.moreno-pineda@kit.edu)*;* [*tang@ciac.ac.cn*](mailto:tang@ciac.ac.cn)*;* [*wolfgang.wernsdorfer@kit.edu*](mailto:wolfgang.wernsdorfer@kit.edu)

***Contents:***

1. Sample sythesis & basic characterization S2

2. Crystallographic details S4

3. Experimental details S8

3.1. Proton nuclear magnetic resonance S8

3.2. Infrared spectrum S8

3.3. X-ray diffraction S8

3.4. Magnetic (SQUID) measurements S8

3.5. μSQUID measurements S8

4. SQUID measurements S9

5. Supporting μSQUID measurements S14

1. **Sample syntheses and characterization:**

All reactions and manipulations were carried out under aerobic conditions. Reagents were purchased from commercial sources and were used without further purification. 2-hydroxy-3-methoxybenzohydrazide was prepared via a previously published method.1

**Scheme S1. Synthesis of ligand HL**


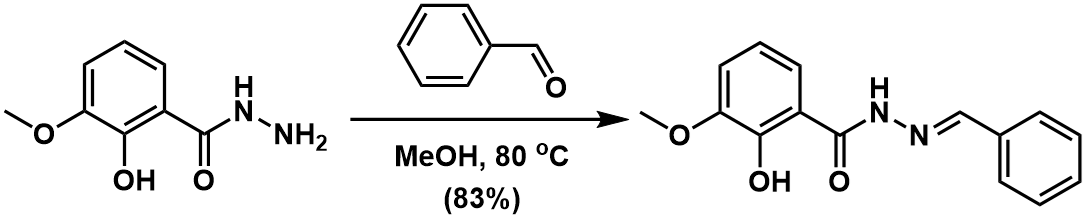


To a solution of benzaldehyde (1.17 g, 11 mmol) in MeOH (40 mL) was added 2-hydroxy-3-methoxybenzohydrazide (2.00 g, 11 mmol) and the mixture was heated to reflux for 24 h. The reaction mixture was concentrated viarotary evaporation. The solid was collected by filtration, washed with cold MeOH and Et2O, dried under vacuum to give product as white solid (2.47 g, 9.1 mmol) in 83% yield. 1H NMR (400 MHz, *d*6-DMSO, 298 K) δ (ppm) 11.86 (s, 1H), 11.82 (s, 1H), 8.47 (s, 1H), 7.75 (d, *J* = 4.8 Hz, 2H), 7.47 (d, *J* = 4.5 Hz, 4H), 7.17 (d, *J* = 7.9 Hz, 1H), 6.90 (t, *J* = 7.9 Hz, 1H), 3.82 (s, 3H).

**Scheme S2. Synthesis of complex Dy3-Ph**


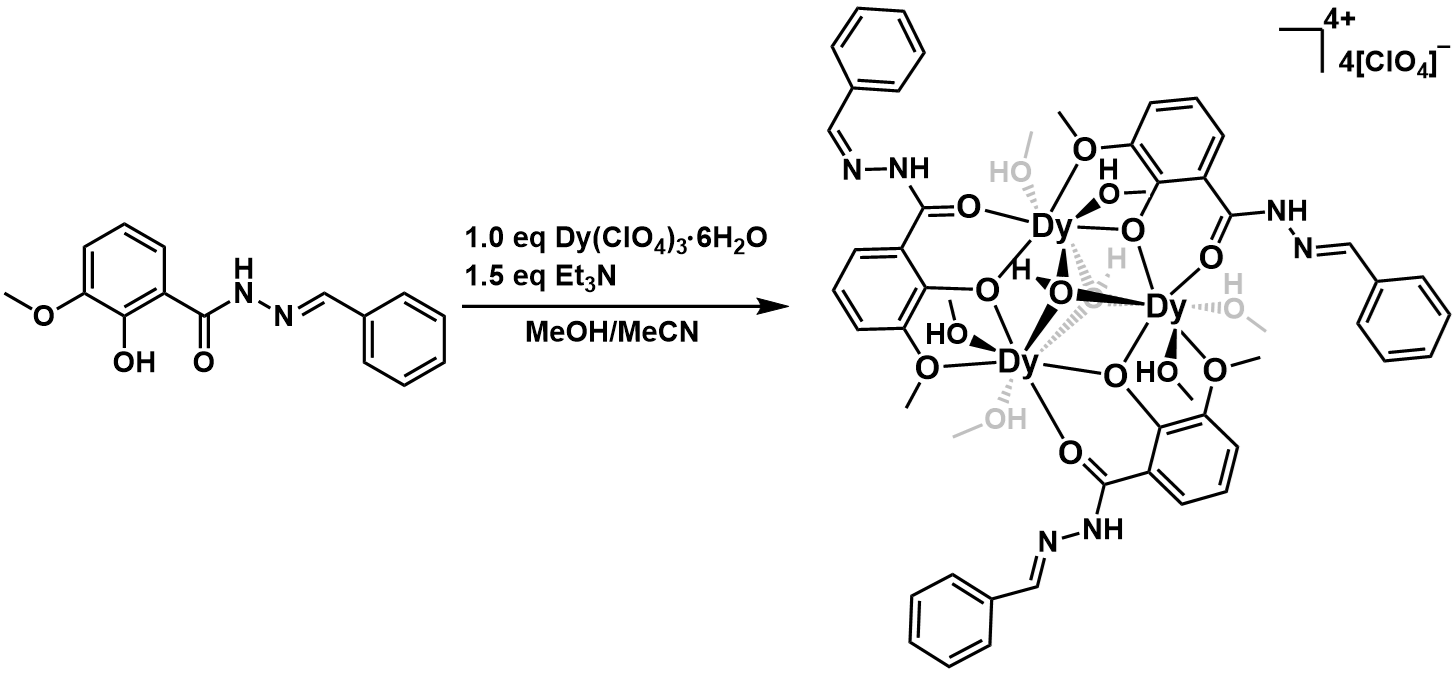


A solution of Dy(ClO4)3·6H2O (0.1 mmol, 0.0569 g) in methanol (10 mL) was added to a solution of HL (0.1 mmol, 0.0270 g) in acetonitrile (5 mL). The mixture was stirred for 5 min, then Et3N (0.15 mmol, 21 *μ*L) was added. After stirring for 3 h at room temperature, the mixture was filtered to give a clear pale-yellow solution. Colorless hexagonal block crystals suitable for single crystal diffraction were obtained after slow diffusion of diethyl ether into this filtrate for several days (Yield: 22 mg, 11%, based on dysprosium). Selected IR (cm-1): 3425 (br), 3317 (br), 3085 (w), 2957 (w), 2851 (w), 2592 (w), 1617 (w), 1594 (s), 1552 (s), 1493 (m), 1449 (w), 1439 (s), 1372 (m), 1312 (s), 1237 (s), 1211 (w), 1082 (s), 1062 (s), 1037 (s), 955 (m), 928 (w), 853 (s), 796 (s), 735 (m), 690 (m), 648 (w), 616 (m).


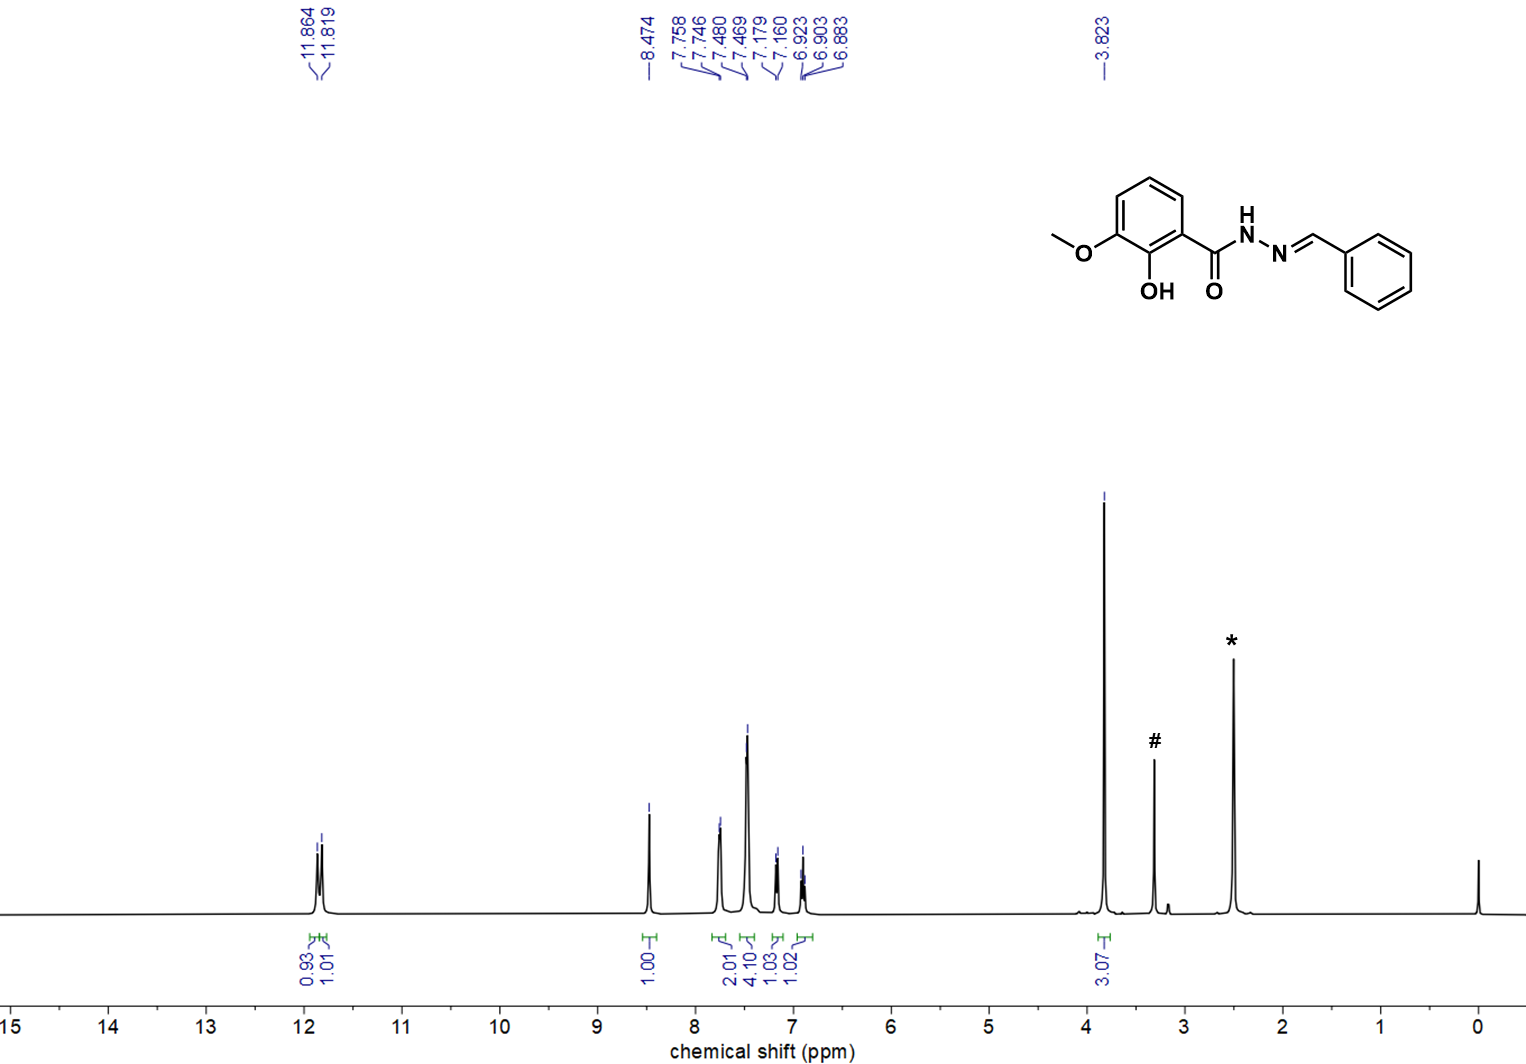


Figure S1. 1H NMR (400 MHz, 298K) spectrum of **HL** in *d*6-DMSO. **d*6-DMSO, **#**H2O.


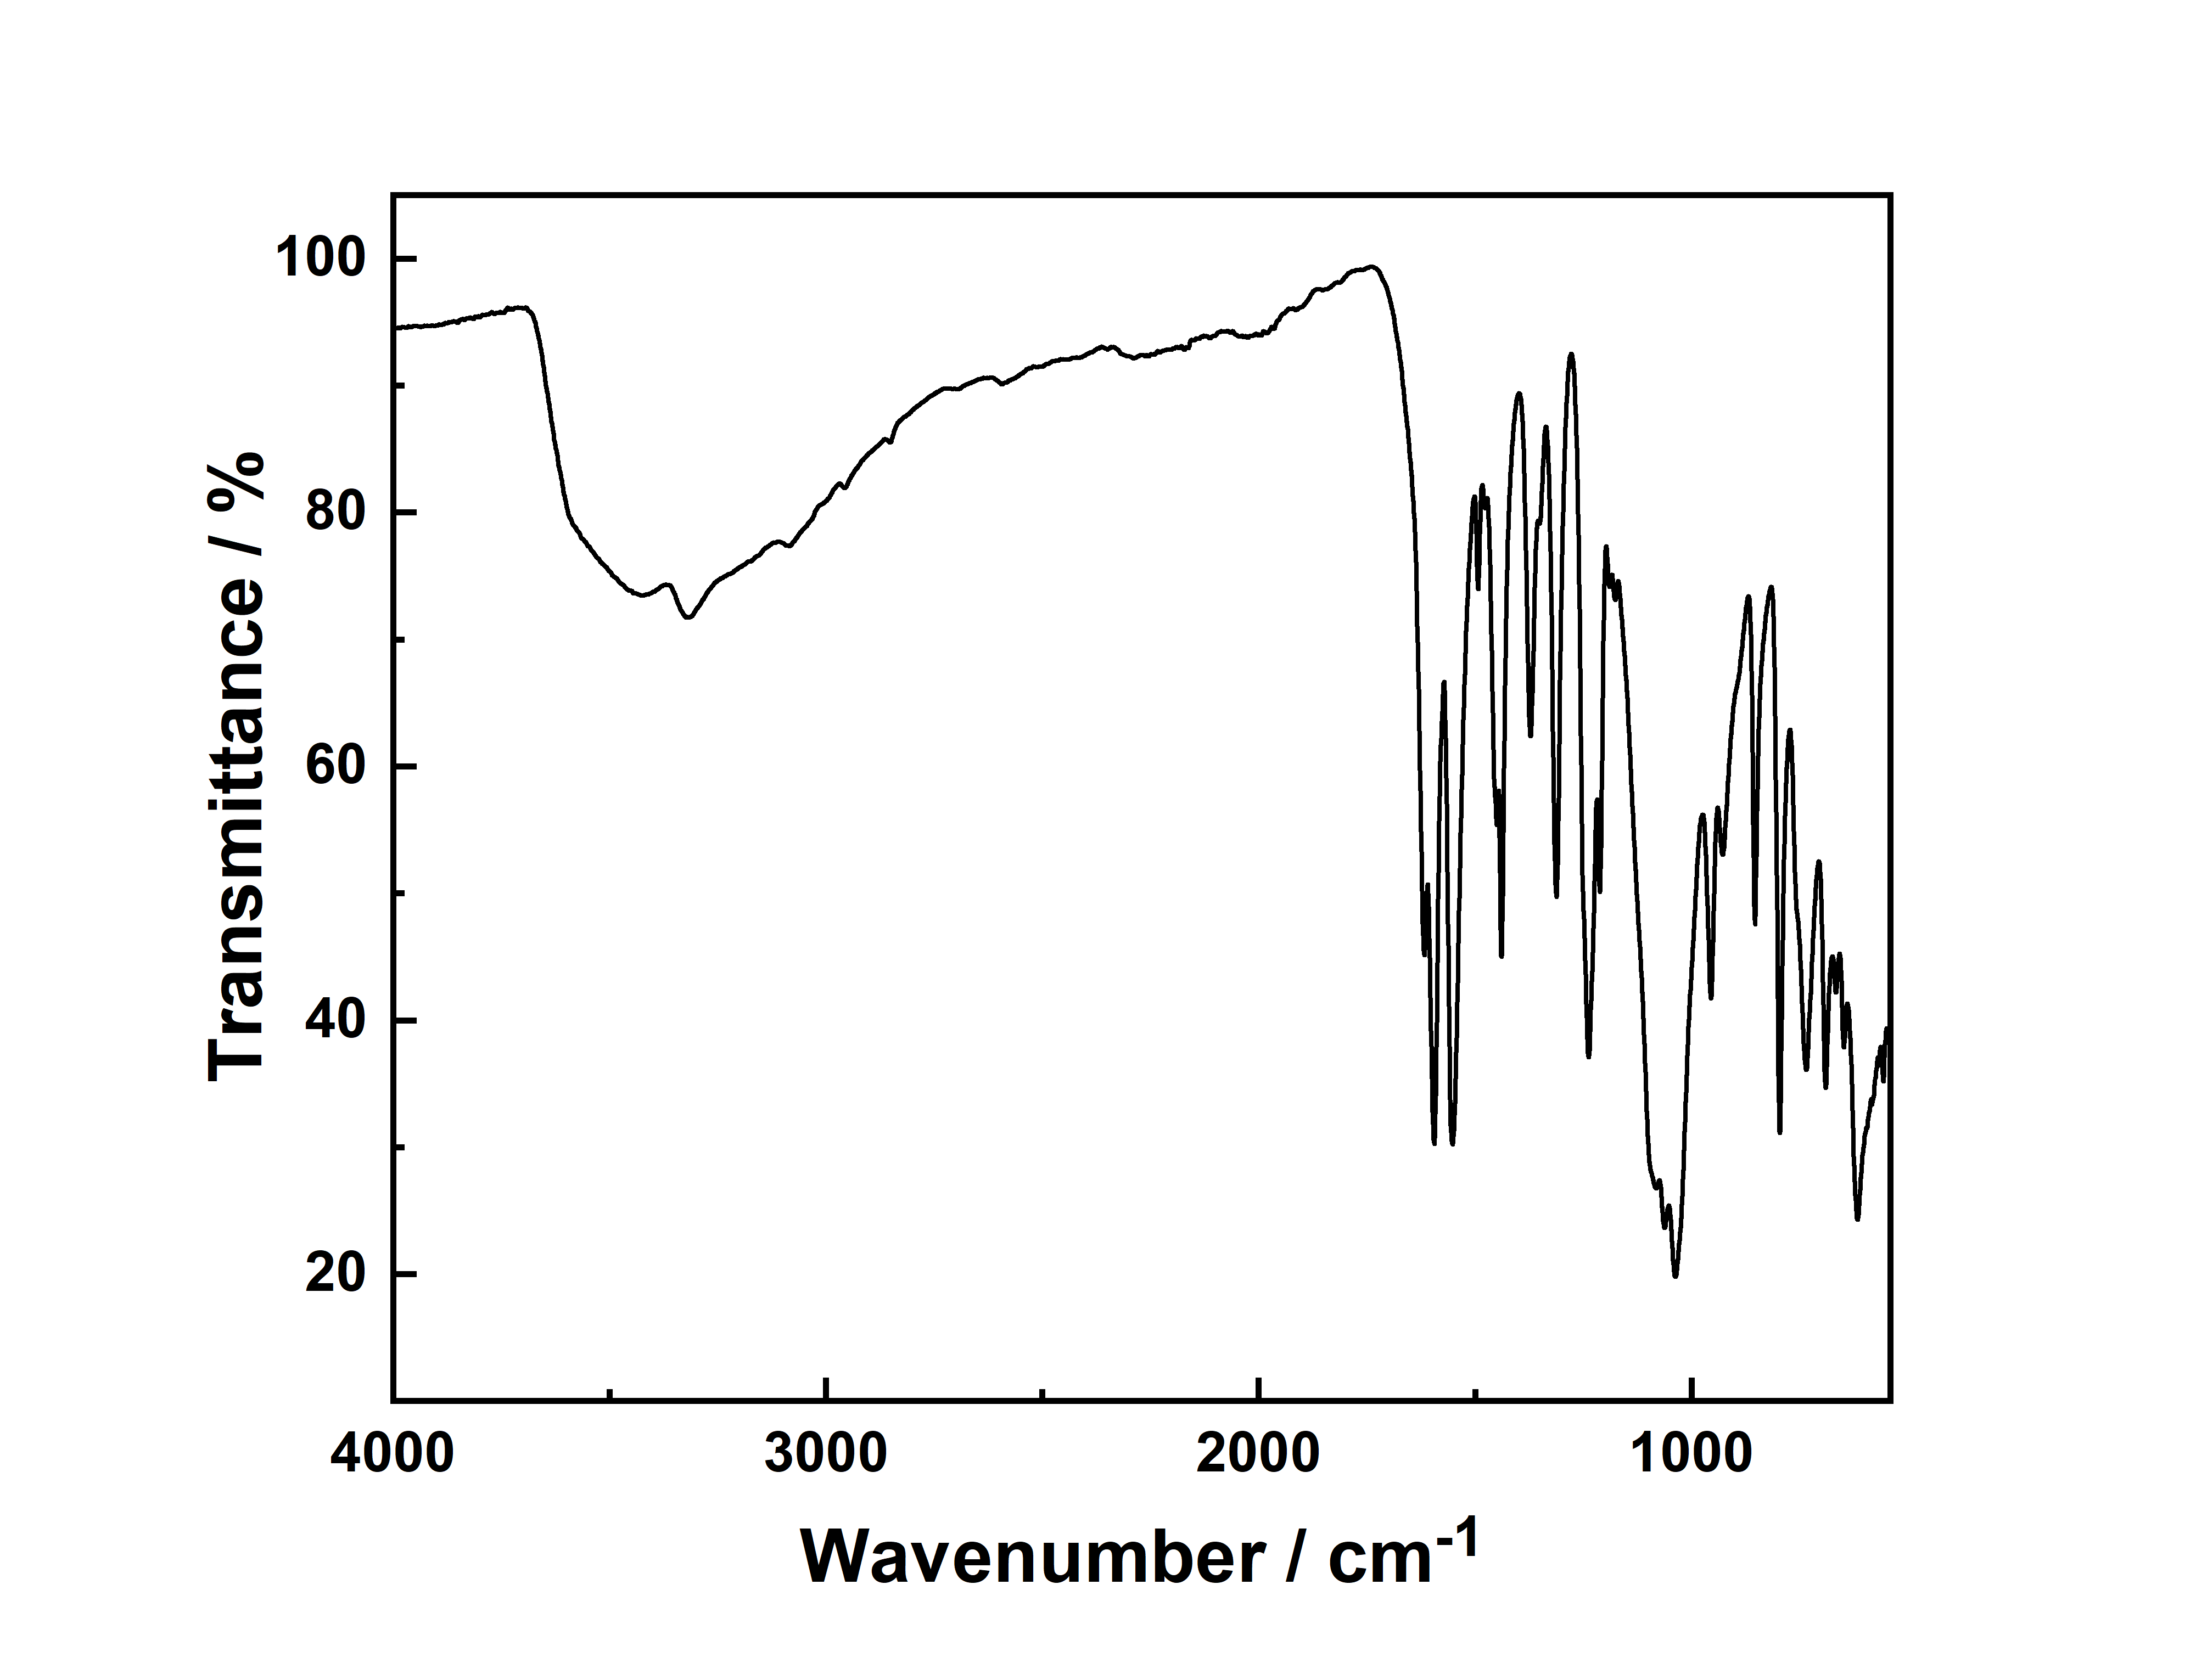


Figure S2. IR spectrum of **Dy3-Ph**.

1. **Crystallographic Details:**

Table S1. Crystal data and structure refinement for **Dy3-Ph**.

| Identification code | Dy3-Ph |
| --- | --- |
| Empirical formula | C51H67Cl4Dy3N6O34 |
| Formula weight | 1937.40 |
| Temperature/K | 180.0 |
| Crystal system | trigonal |
| Space group | *R*-3 |
| *a*/Å | 16.7769(6) |
| *b*/Å | 16.7769(6) |
| *c*/Å | 47.197(3) |
| *α*/° | 90 |
| *β*/° | 90 |
| *γ*/° | 120 |
| Volume/Å3 | 11504.4(11) |
| Z | 6 |
| *ρ*calc/g/cm3 | 1.678 |
| *μ*/mm‑1 | 3.117 |
| *F*(000) | 5718.0 |
| Crystal size/mm3 | 0.26 × 0.16 × 0.06 |
| Radiation | MoKα (λ = 0.71073) |
| 2*Θ* range for data collection/° | 4.856 to 50.046 |
| Index ranges | -19 ≤ *h* ≤ 19, -19 ≤ *k* ≤ 19, -56 ≤ *l* ≤ 56 |
| Reflections collected | 52704 |
| Independent reflections | 4511 [*R*int = 0.0876, *R*sigma = 0.0374] |
| Data/restraints/parameters | 4511/249/409 |
| Goodness-of-fit on *F*2 | 1.054 |
| Final *R* indexes [I>=2*σ* (I)] | *R*1 = 0.0738, *wR*2 = 0.1933 |
| Final *R* indexes [all data] | *R*1 = 0.0912, *wR*2 = 0.2067 |
| Largest diff. peak/hole / e Å-3 | 2.20/-1.69 |
| CCDC number | 2442450 |

Table S2. Selected bond distances [Å] and angles [°] for **Dy3-Ph**.

| Dy1-O1 | 2.366(7) | Dy1-O42 | 2.311(8) |
| --- | --- | --- | --- |
| Dy1-O2 | 2.3566(5) | Dy1-O5 | 2.267(7) |
| Dy1-O32 | 2.496(8) | Dy1-O6 | 2.385(11) |
| Dy1-O4 | 2.331(8) | Dy1-O7 | 2.364(10) |
| O42-Dy1-O4 | 141.0(3) | O2-Dy1-O6 | 137.5(3) |
| O42-Dy1-O2 | 72.46(19) | O5-Dy1-O4 | 73.2(3) |
| O4-Dy1-O2 | 72.1(2) | O5-Dy1-O42 | 145.1(3) |
| O4-Dy1-O32 | 154.3(3) | O5-Dy1-O2 | 132.1(2) |
| O42-Dy1-O32 | 64.6(3) | O5-Dy1-O32 | 81.3(3) |
| O42-Dy1-O1 | 74.7(2) | O5-Dy1-O1 | 135.8(3) |
| O4-Dy1-O1 | 74.4(2) | O5-Dy1-O7 | 77.4(4) |
| O4-Dy1-O7 | 99.4(4) | O5-Dy1-O6 | 77.5(4) |
| O42-Dy1-O7 | 87.8(3) | O1-Dy1-O32 | 124.9(3) |
| O42-Dy1-O6 | 99.8(4) | O1-Dy1-O6 | 76.5(4) |
| O4-Dy1-O6 | 95.4(4) | O7-Dy1-O32 | 77.7(4) |
| O2-Dy1-O32 | 130.3(2) | O7-Dy1-O1 | 137.5(4) |
| O2-Dy1-O1 | 61.1(3) | O7-Dy1-O6 | 145.6(4) |
| O2-Dy1-O7 | 76.8(3) | O6-Dy1-O32 | 75.6(4) |

Symmetry codes: 11+Y-X, 2-X, +Z; 22-Y, 1+X-Y, +Z.

Table S3. The CShM values calculated by SHAPE 2.1 program for **Dy3-Ph**.2-4

| **Central atom** | **Shape** | **CShM** |
| --- | --- | --- |
| Dy | Octagon (*D*8h) | 31.004 |
| Heptagonal pyramid (*C*7v) | 22.449 |
| Hexagonal bipyramid (*D*6h) | 16.153 |
| Cube (*O*h) | 10.112 |
| Square antiprism (*D*4d) | 2.345 |
| Triangular dodecahedron (*D*2d) | 0.657 |
| Johnson - Gyrobifastigium (J26) (*D*2d) | 14.298 |
| Johnson - Elongated triangular bipyramid (J14) (*D*3h) | 29.649 |
| Johnson - Biaugmented trigonal prism (J50) (*C*2v) | 3.069 |
| Biaugmented trigonal prism (*C*2v) | 2.250 |
| Snub disphenoid (J84) (*D*2d) | 3.050 |
| Triakis tetrahedron (*T*d) | 10.917 |
| Elongated trigonal bipyramid (*D*3h) | 23.412 |


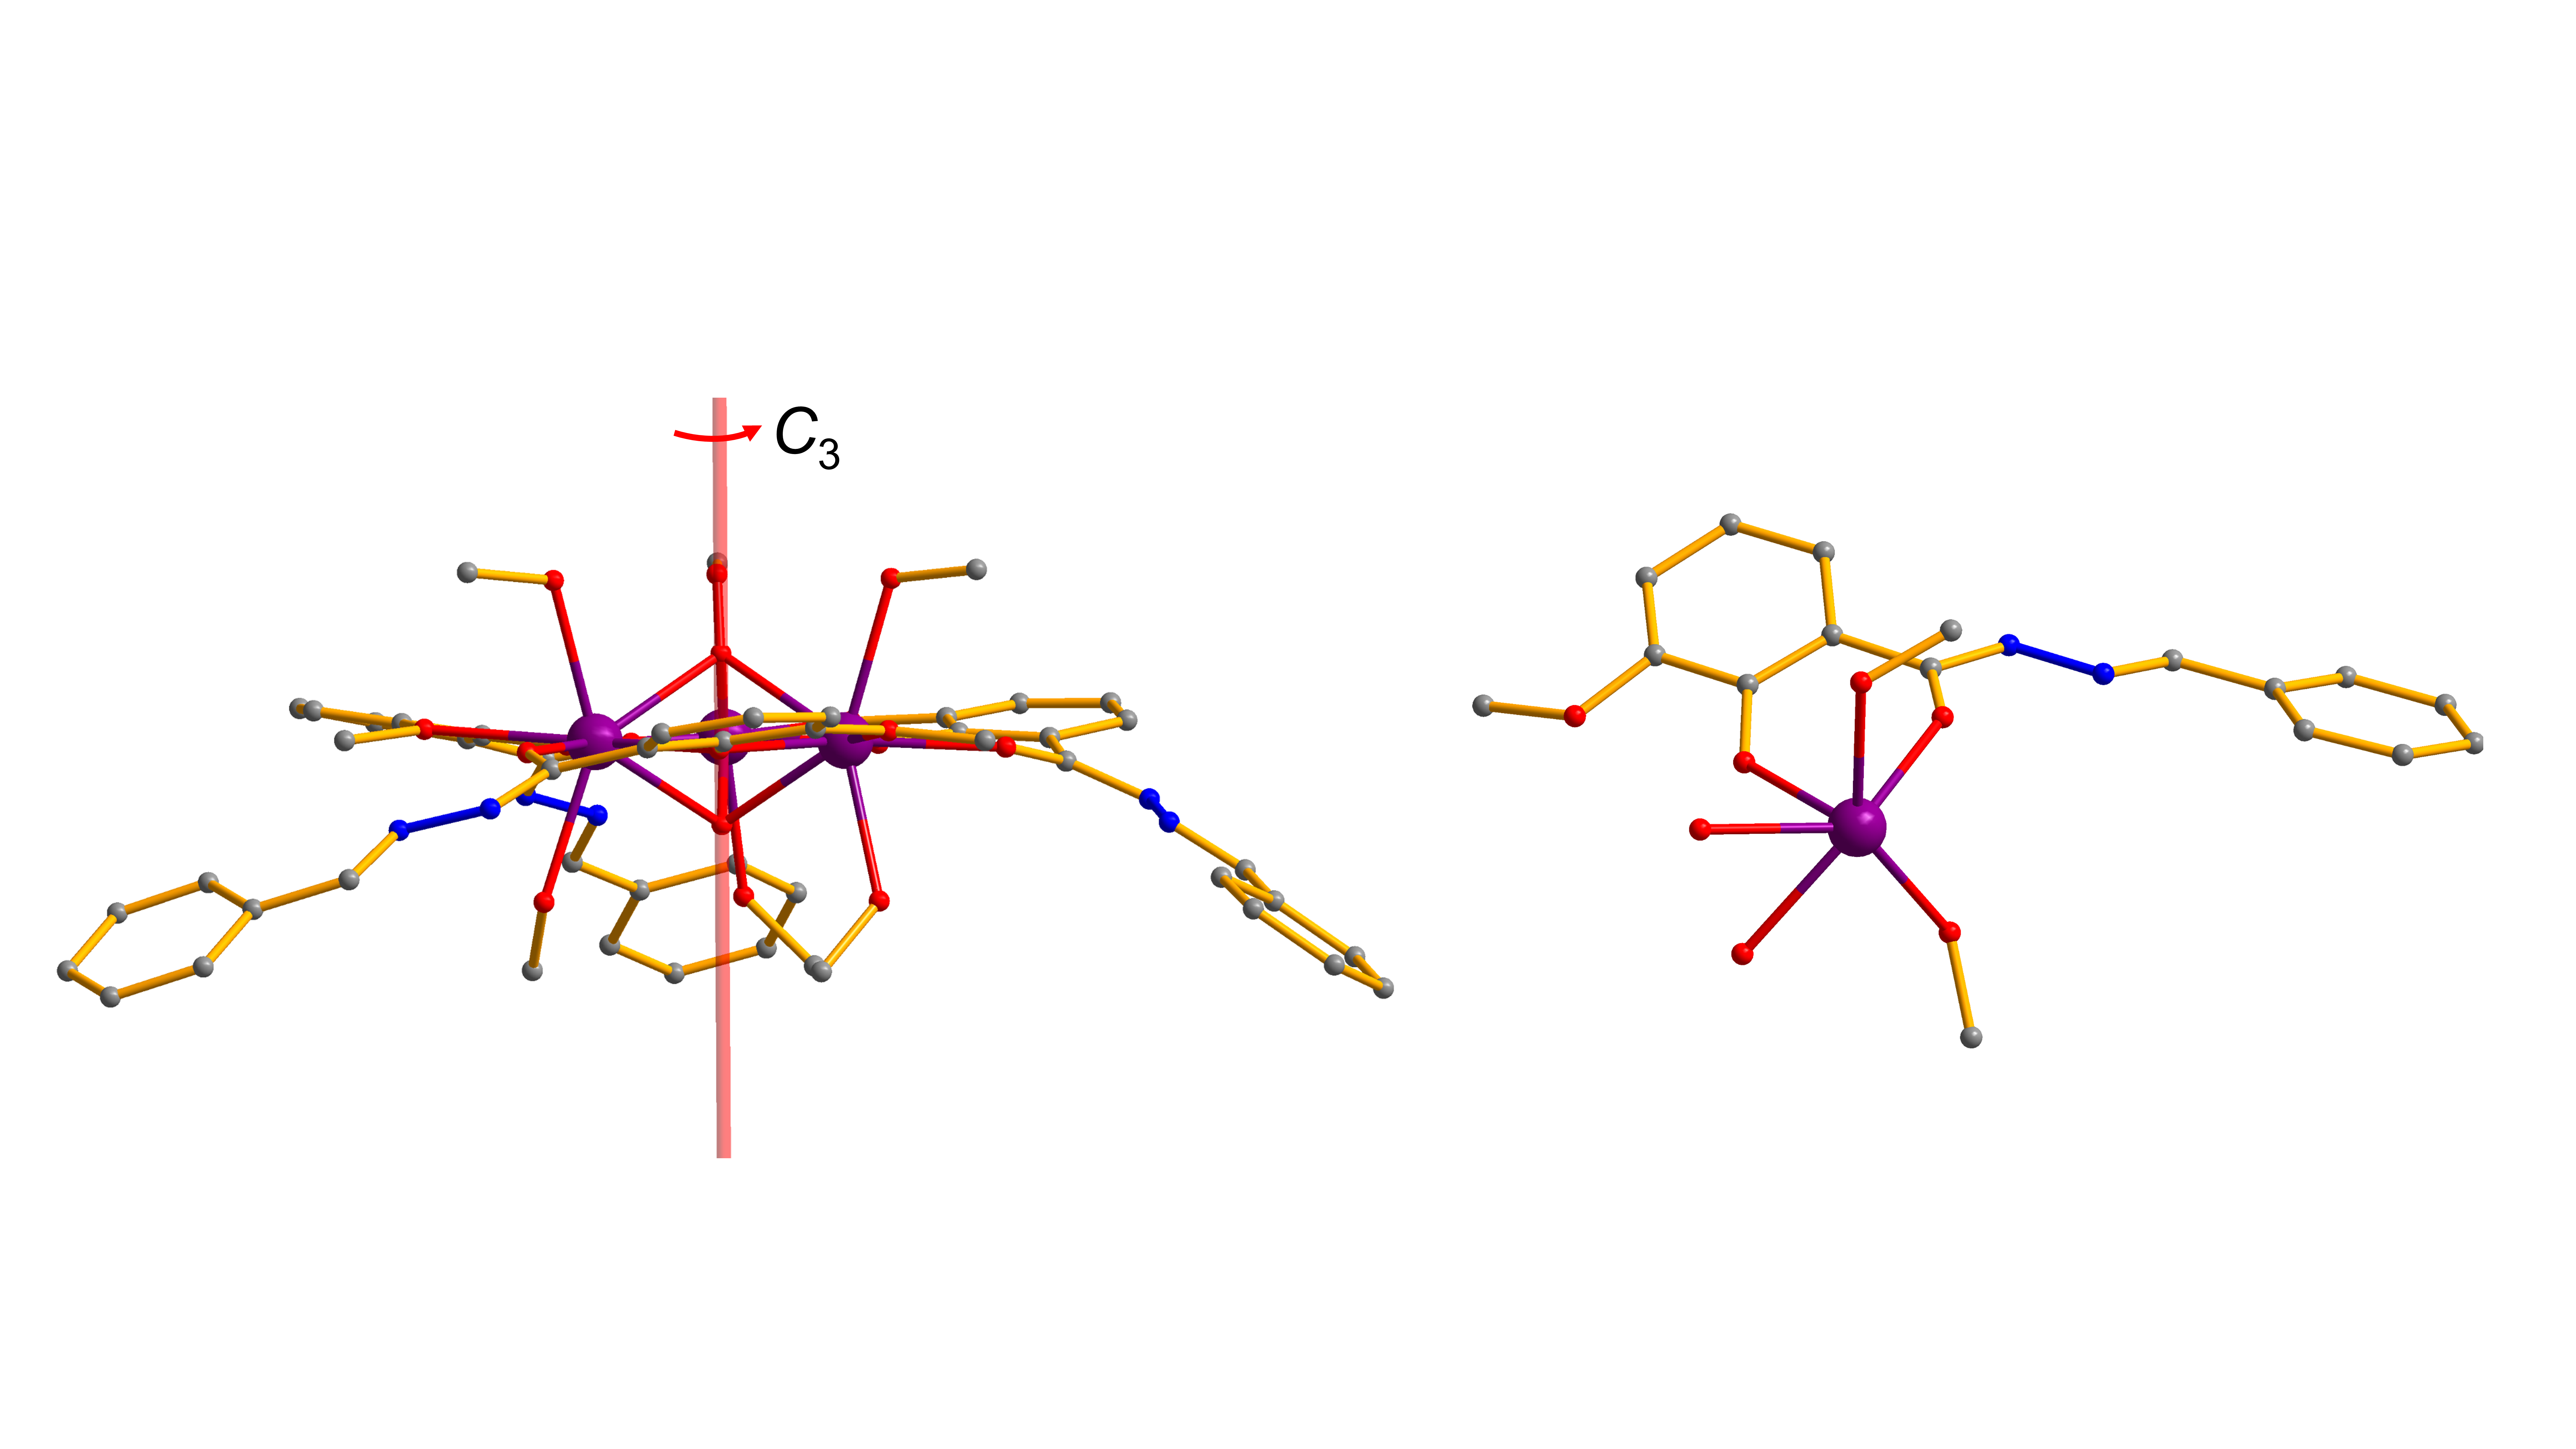


Figure S3. Orientation of the molecular *C*3 axis (left) and asymmetric unit (right) in the crystal of **Dy3-Ph**. Dy, violet; N, blue; O, red; C, gray. For clarity, hydrogen atoms and ClO4- anions are omitted.


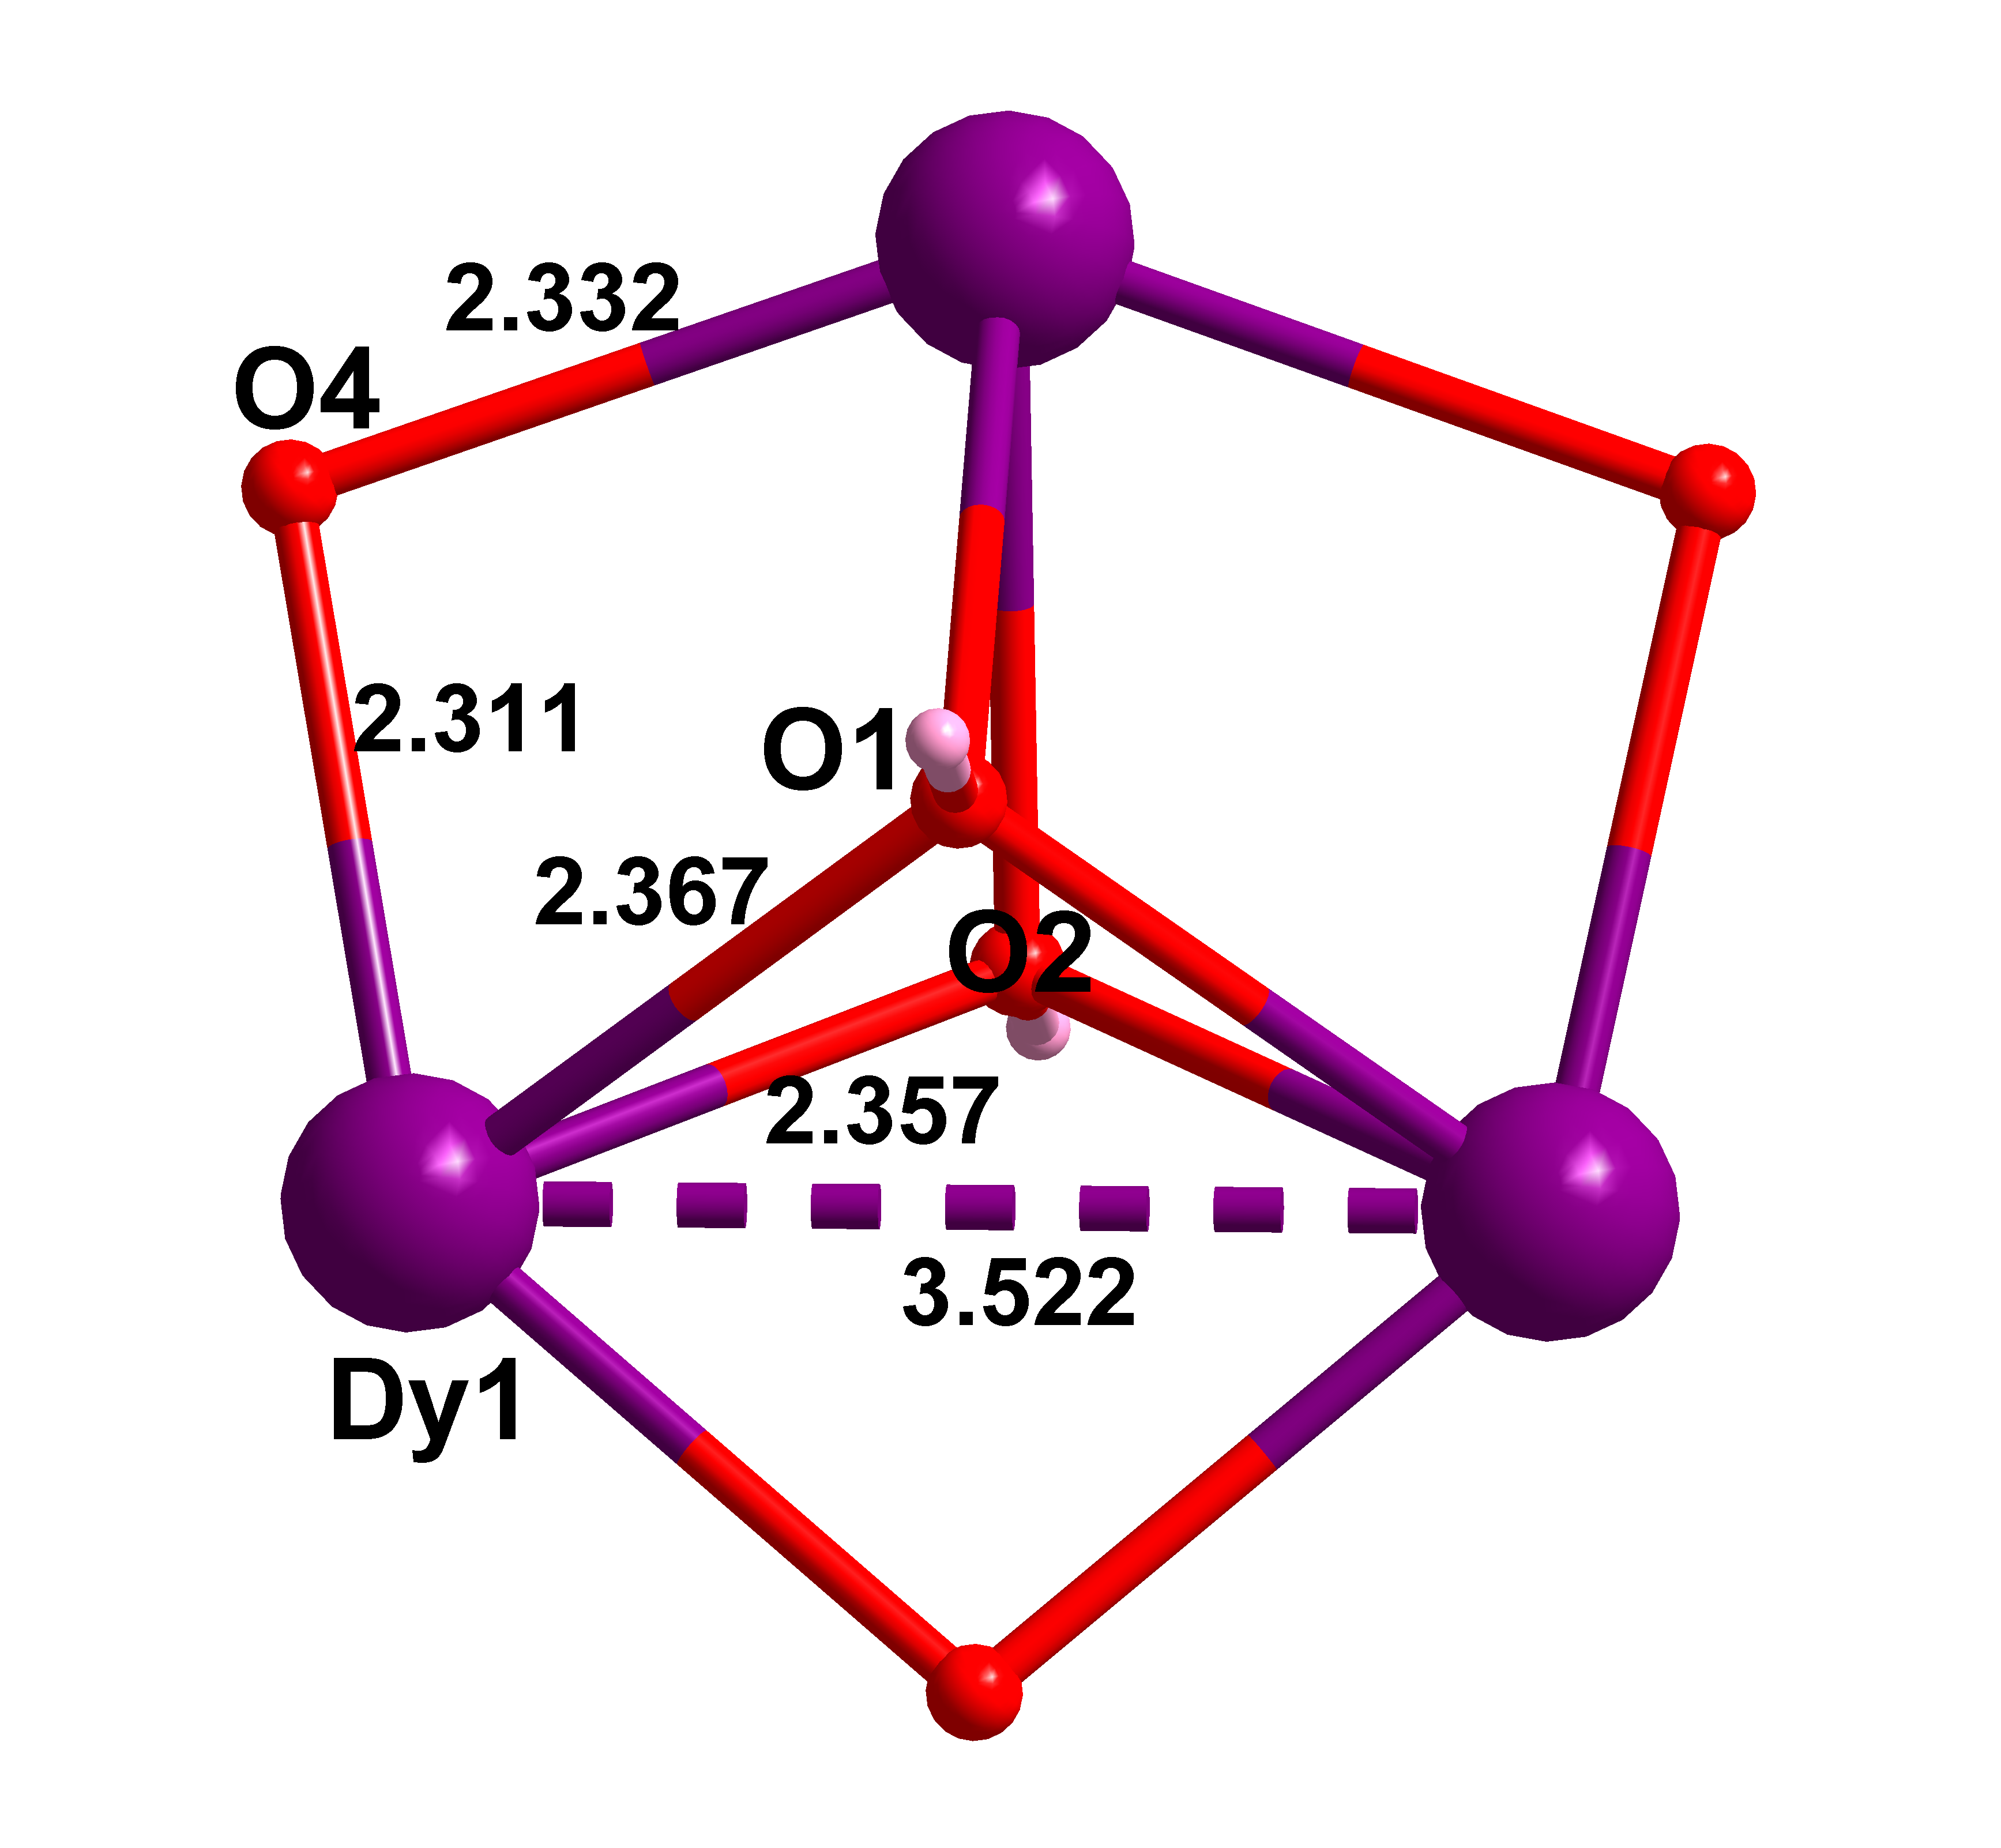


Figure S4. Central core of **Dy3-Ph**.


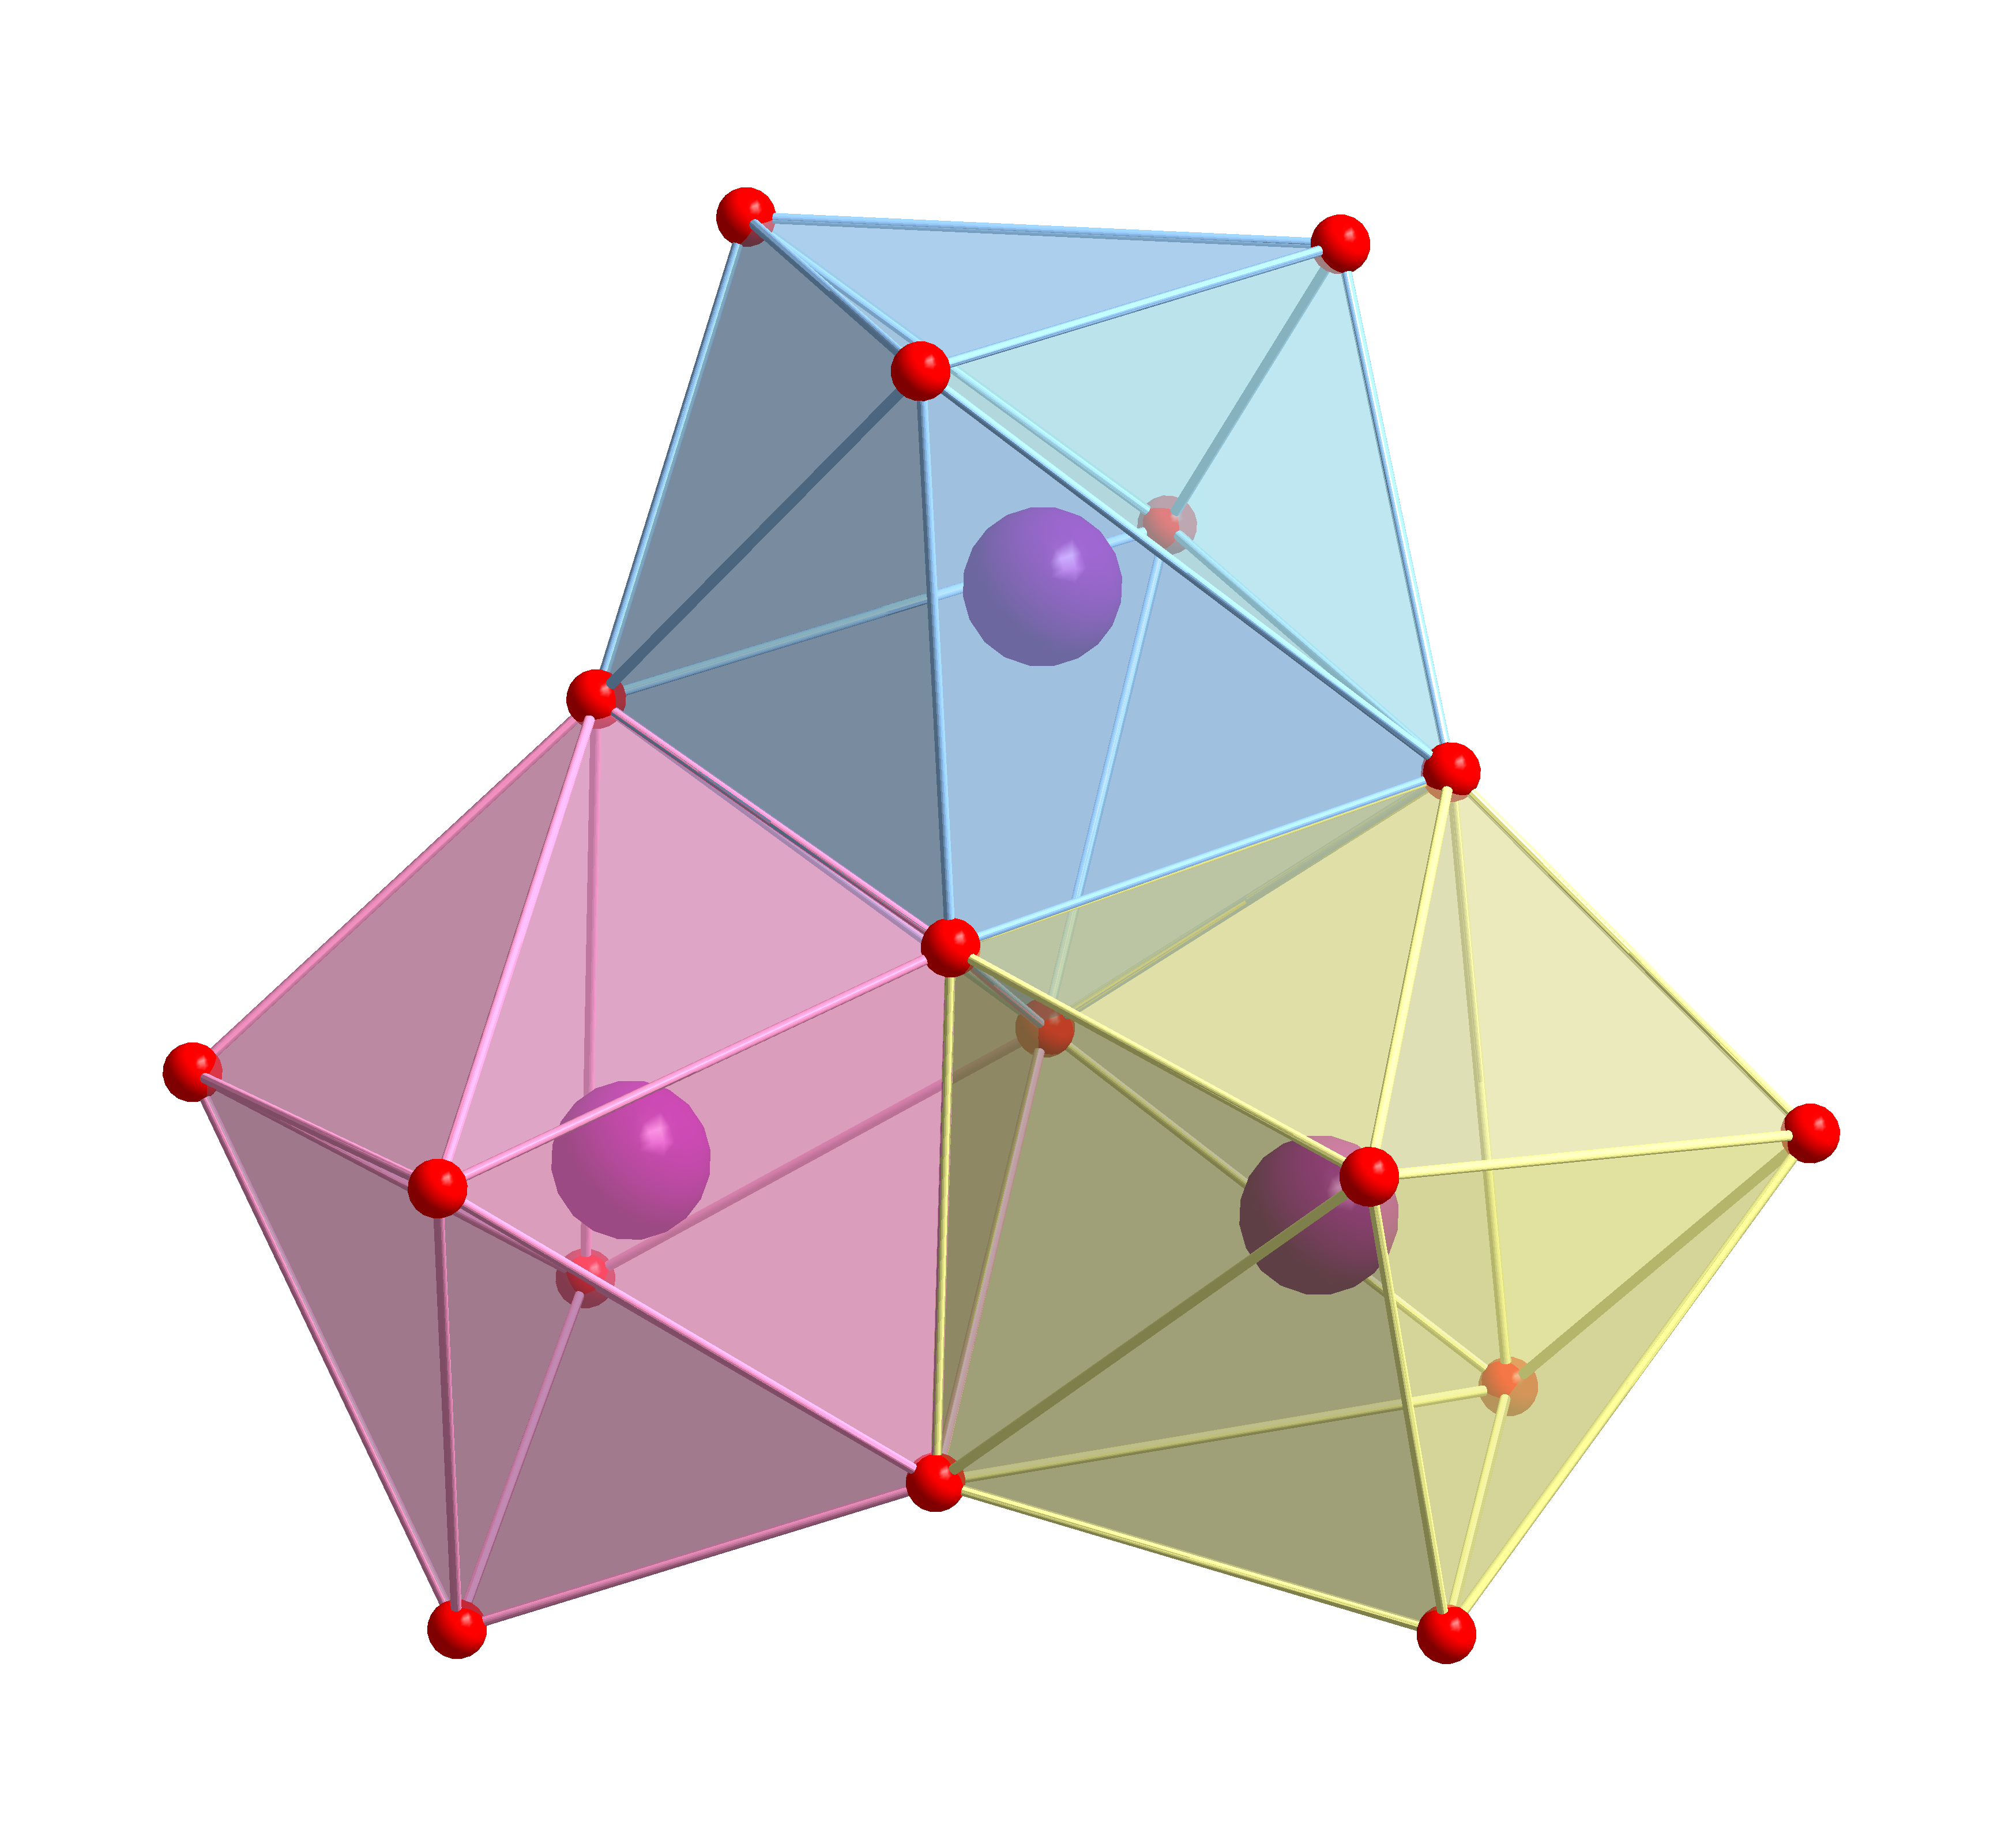


Figure S5. Coordination polyhedra of **Dy3-Ph**.


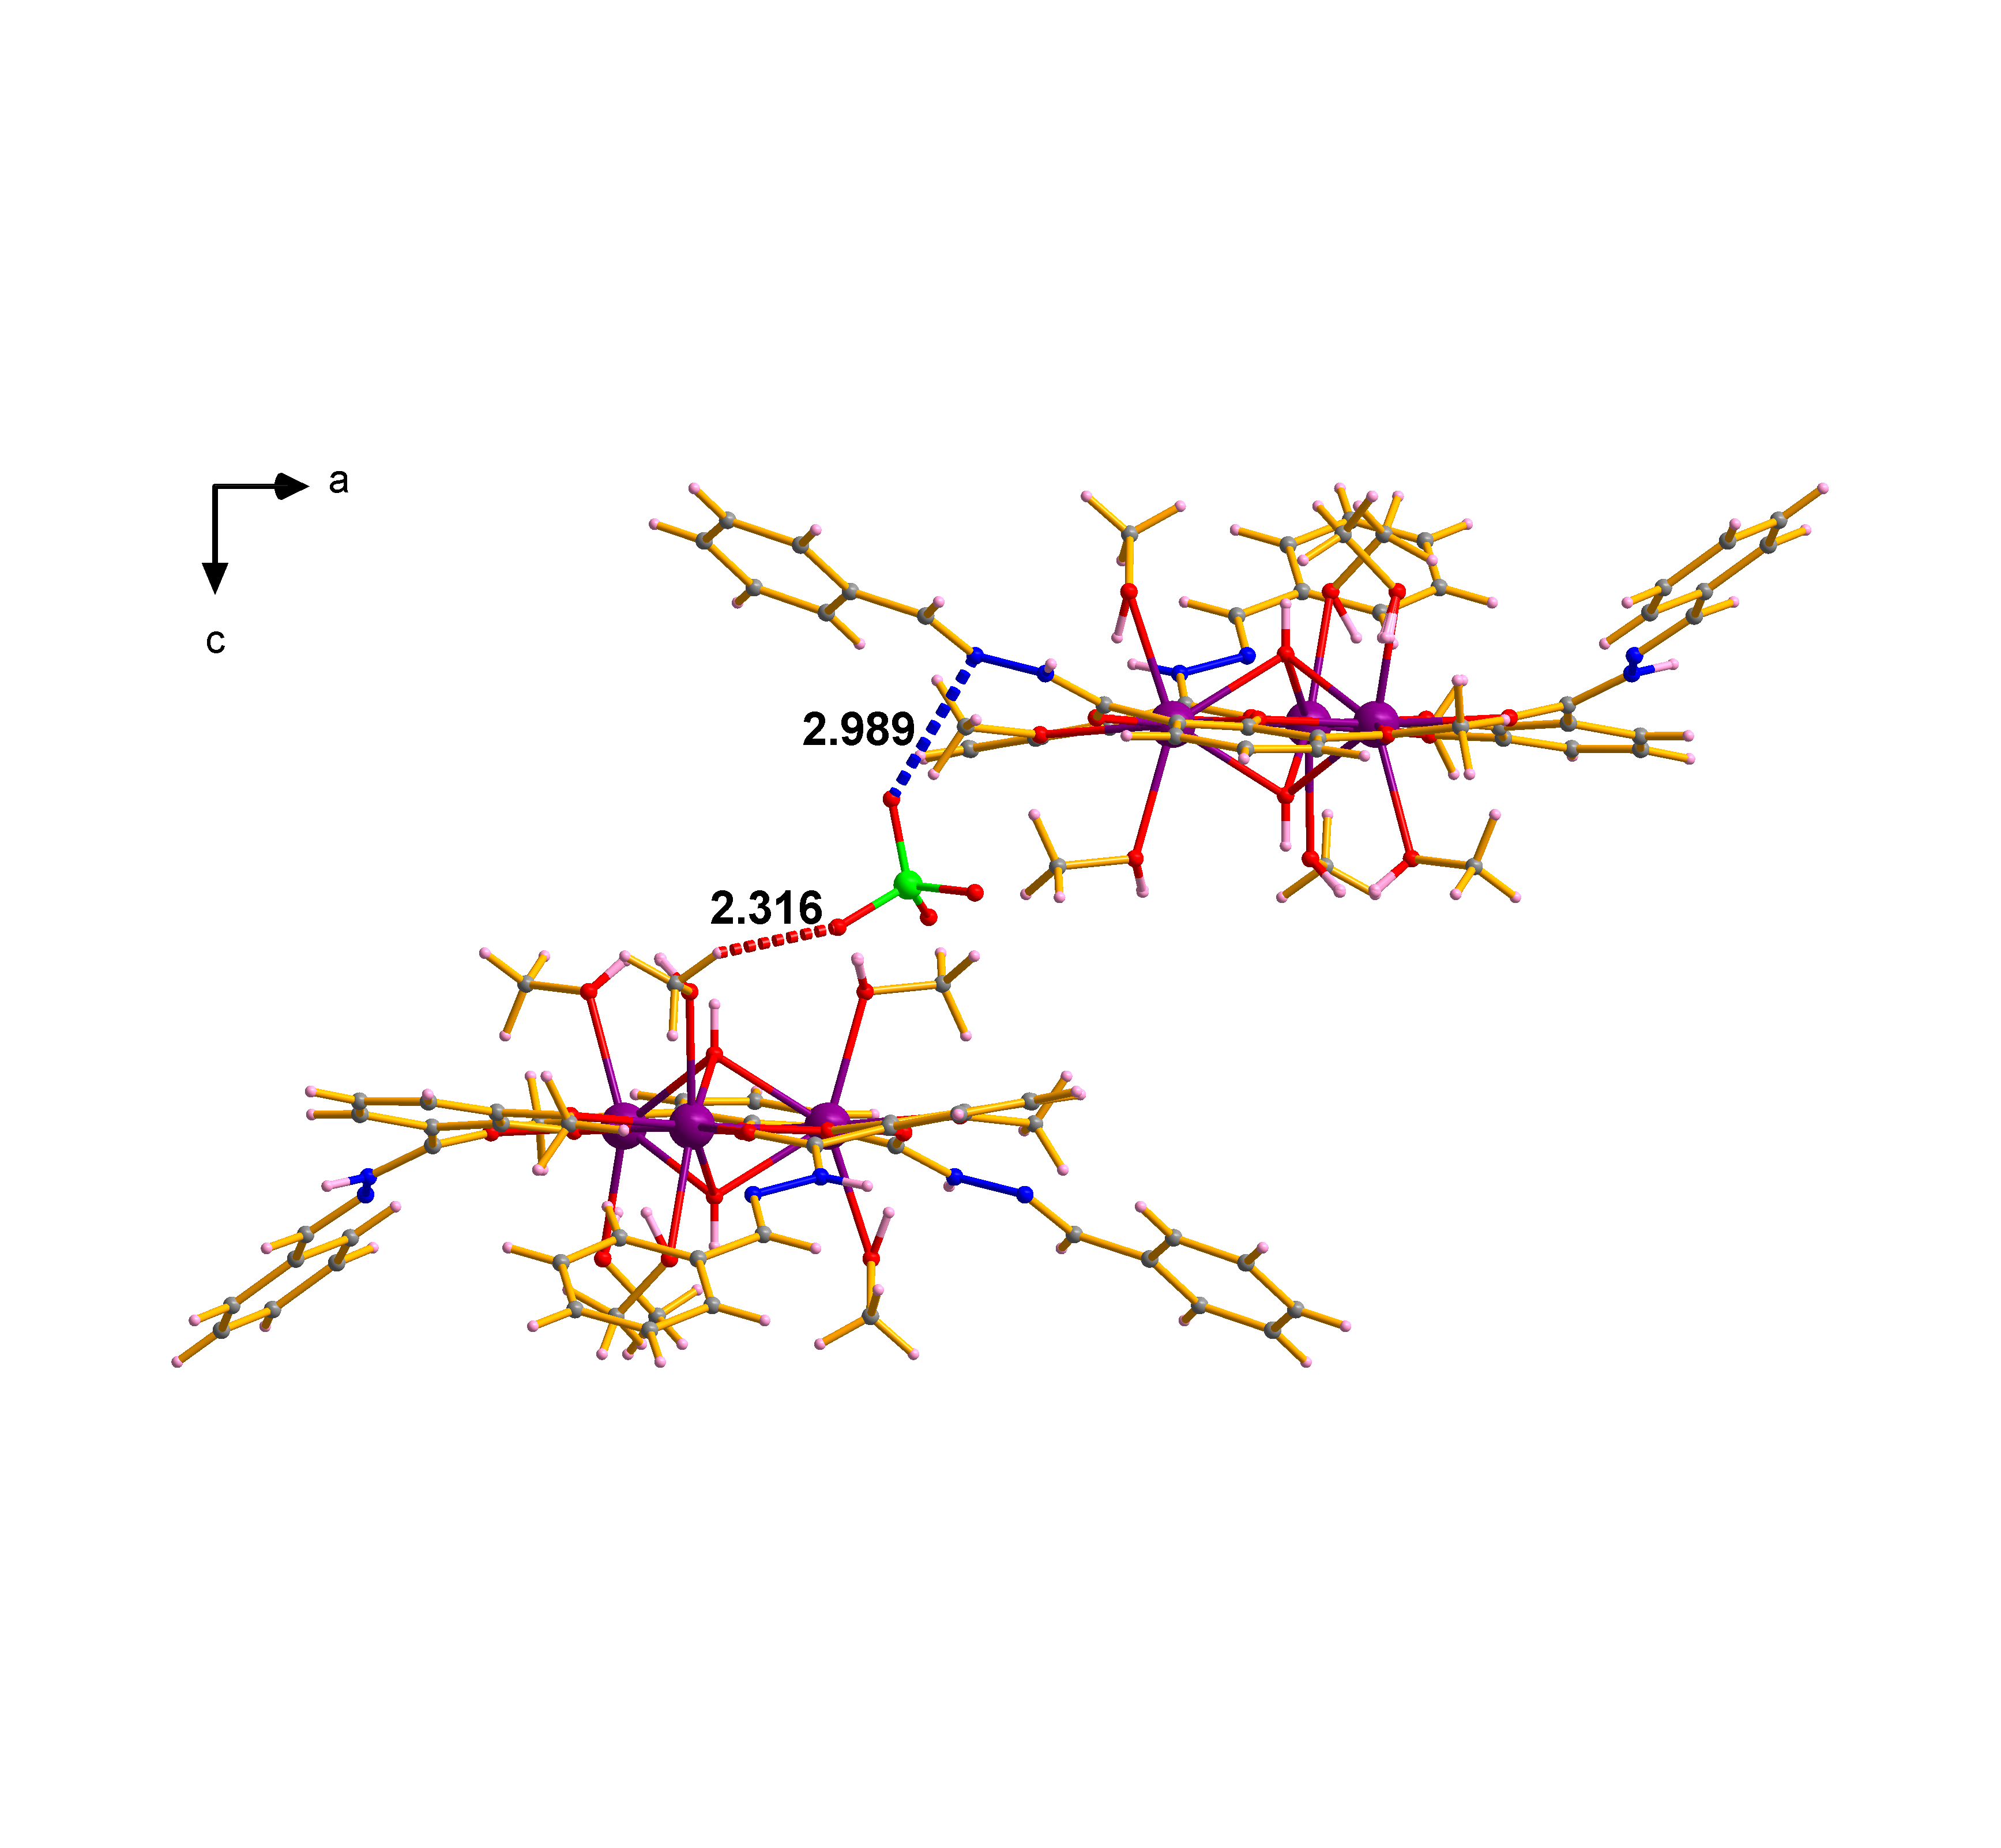


Figure S6. Intermolecular C-H···O (red dashed line) interaction with 2.316 Å and Cl-O···N (blue dashed line) interaction with 2.989 Å of **Dy3-Ph** viewed along *b* axis. Dy, violet; N, blue; O, red; C, gray; H rose.


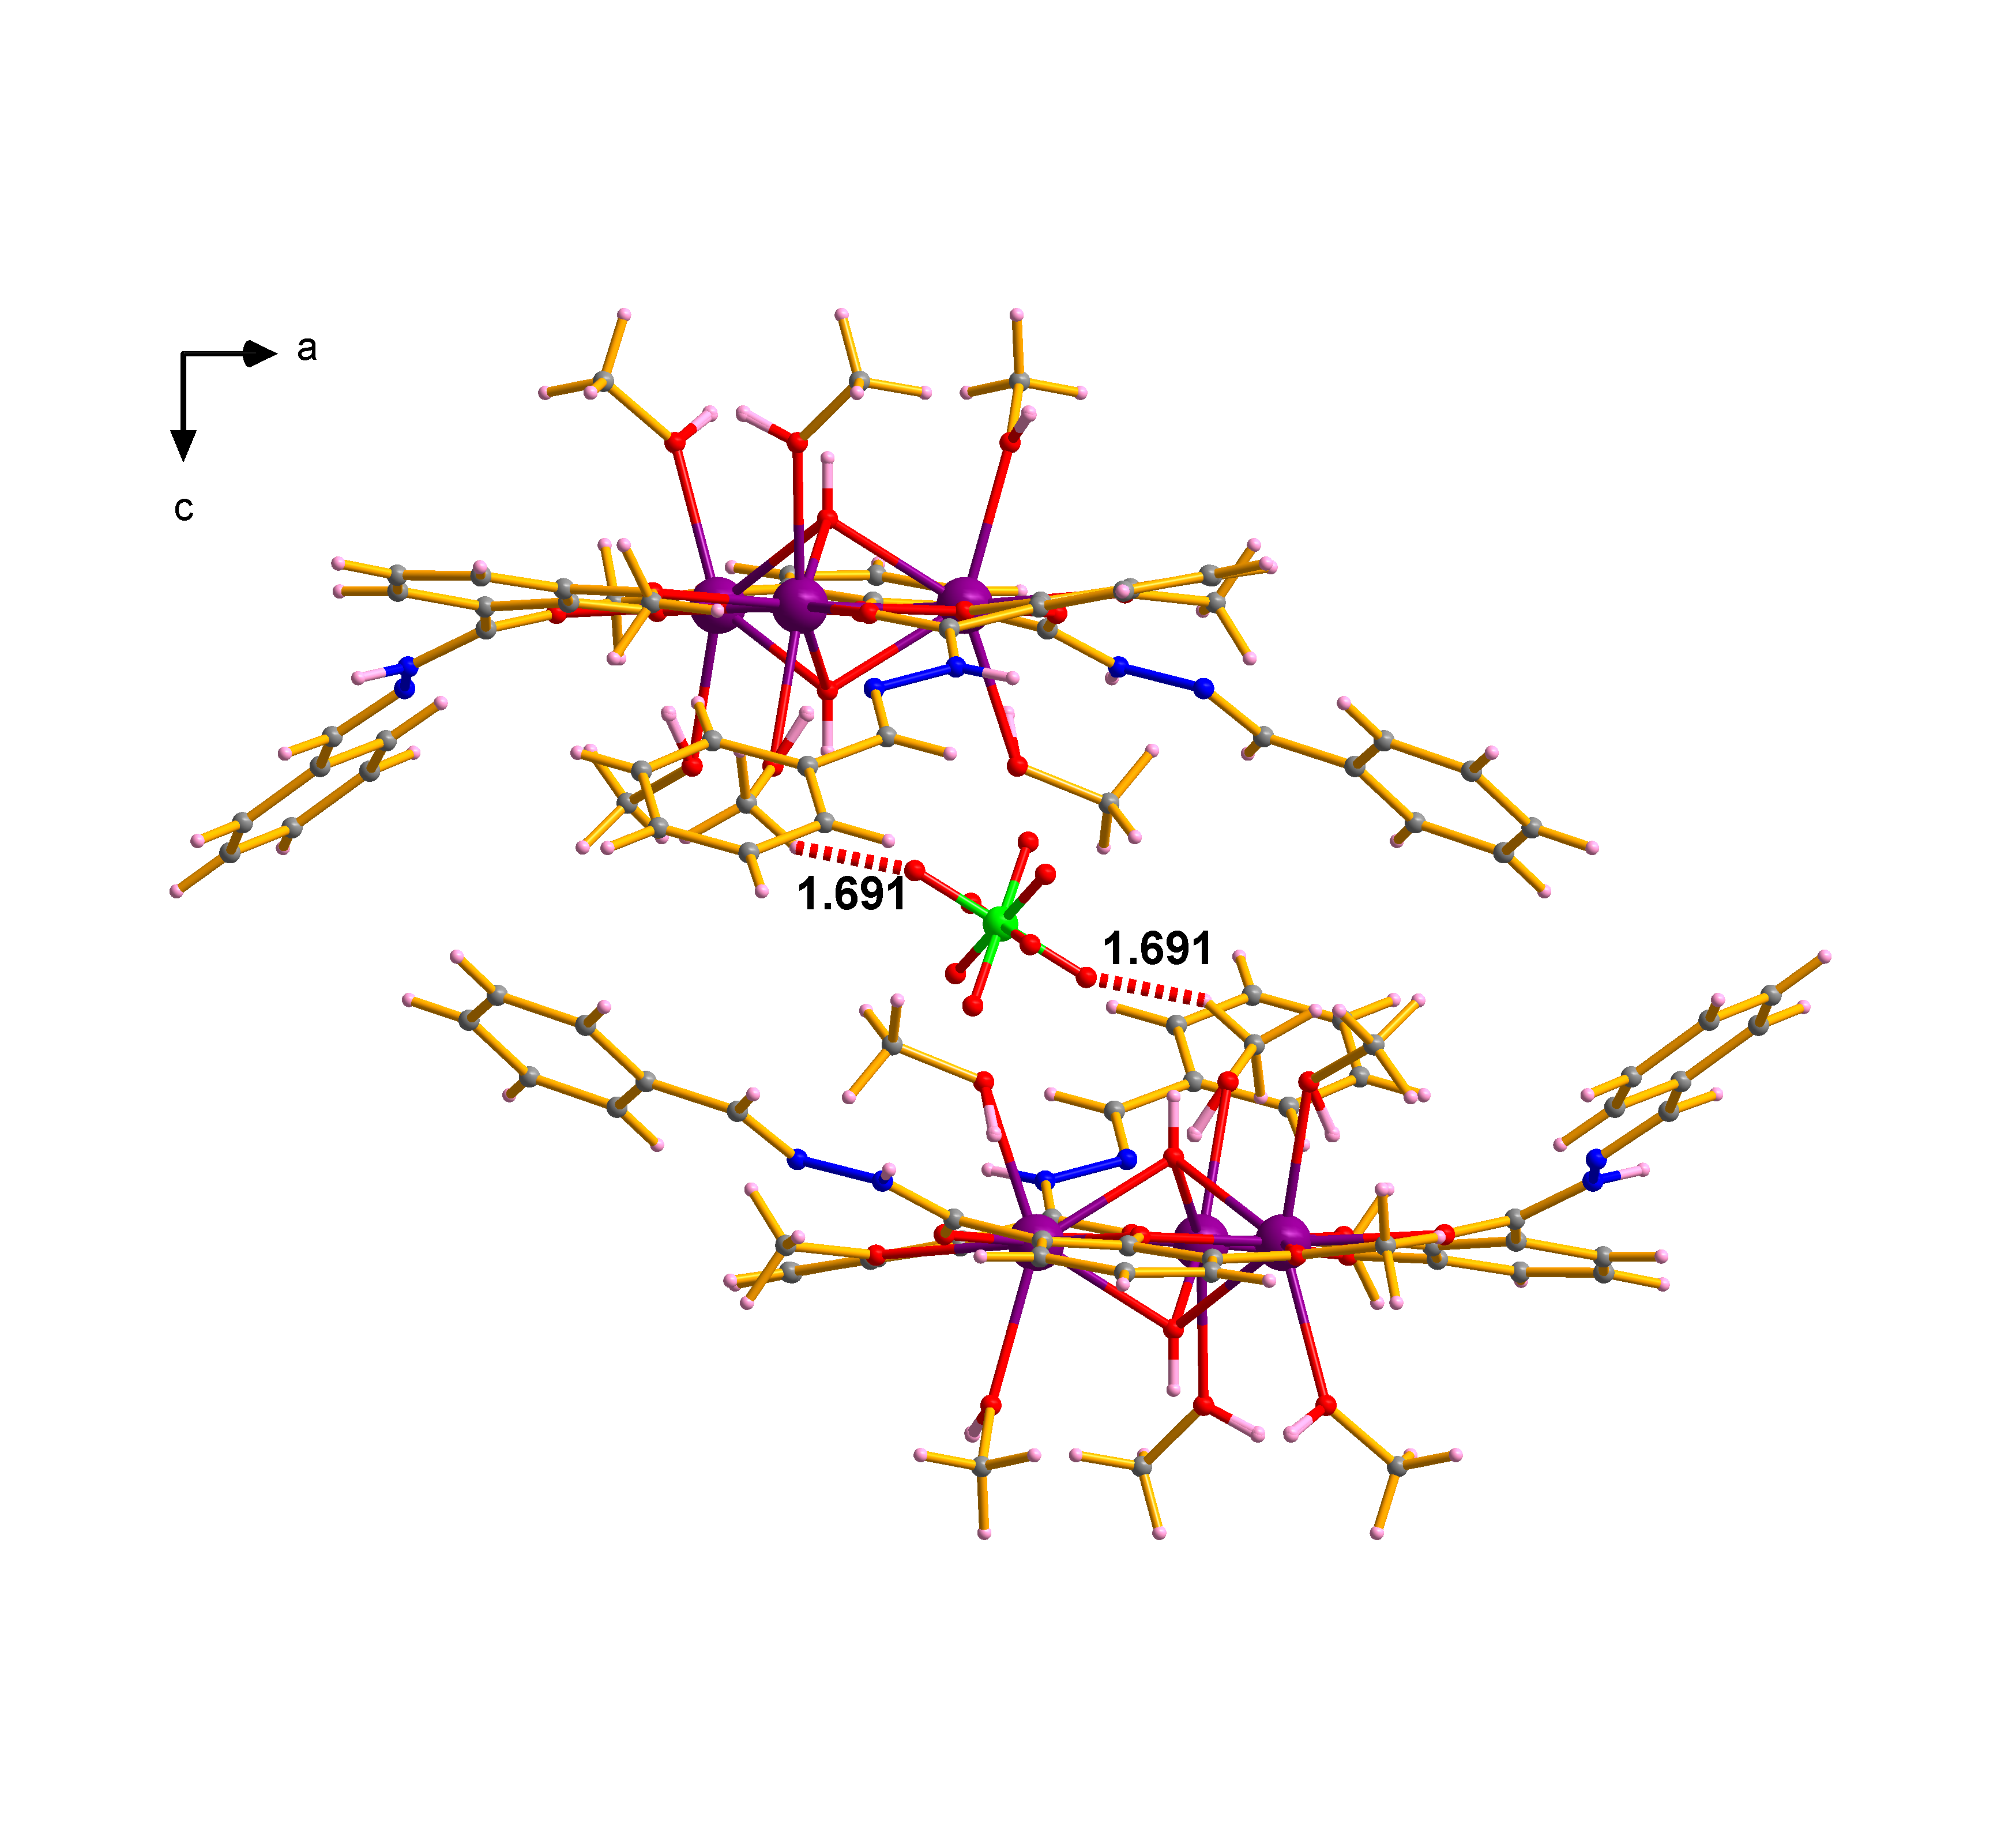


Figure S7. Intermolecular C-H···O (red dashed lines) interactions with 1.691 Å of **Dy3-Ph** viewed along *b* axis. Dy, violet; N, blue; O, red; C, gray; H rose.

**3. Experimental Details:**

**3.1. Proton nuclear magnetic resonance** (1H NMR**)** spectrum was recorded on Bruker AV400 MHz instrument and calibrated using TMS (0.00 ppm) as an internal reference. The following abbreviations were used to explain the multiplicities: s = singlet, d = doublet, t = triplet.

**3.2. Fourier transform infrared spectrum** (FT-IR) was recorded on a Nicolet 6700 Flex FTIR spectrometer equipped with a smart iTR attenuated total reflectance (ATR) sampling accessory and labeled according to their relative intensities with br (broad), s (strong), m (medium), and w (weak).

**3.3. Single-crystal X-ray diffraction** (SCXRD) measurement was performed on a Bruker D8 Venture CCD diffractometer with graphite-monochromated Mo Kα radiation ( = 0.71073 Å). The crystal was measured at 180 K. The program APEX3 was used to integrate the data, which was thereafter corrected for absorption using multi-scan method. The structure was solved by intrinsic phasing methods and refined by full-matrix least-squares methods on F2 with anisotropic thermal parameters for all non-hydrogen atoms by using the SHELXT5 (intrinsic phasing methods) and refined by SHELXL6 (full matrix least-squares techniques) in the Olex27 package. All non-hydrogen atoms were refined with anisotropic displacement parameters. The hydrogen atoms were introduced in calculated positions and refined with a fixed geometry with respect to their carrier atoms. Crystallographic data, refinement details and CCDC number are given in Table S1.

**3.4. Magnetic (SQUID) measurements:**

Magnetic measurements (powder sample) down to 2 K temperature were performed using a Quantum Design MPMS-XL7 SQUID magnetometer. Variable-temperature direct current (dc) magnetic susceptibility data were collected with an external magnetic field of 1000 Oe in the temperature range of 2–300 K and variable field magnetization data from ±7 T were collected. Alternating current (ac) magnetic susceptibility data were collected in zero applied field using a 3.0 Oe ac oscillating field. The experimental magnetic data were corrected for the diamagnetism estimated from Pascal’s constants8 and sample holder calibration.

**3.5. μSQUID measurements:**

Magnetization measurements over the temperature range 0.03–5.0 K were performed on single crystals of the compound using µSQUID magnetometry. A single crystal of approximately 50 µm in length (arm-length of triangular crystals) was positioned adjacent to a µSQUID array on the chip, leaving only a few micrometers between the crystal edge and the nearest µSQUID loop to maximize magnetic coupling. The crystal was thermalized with Apiezon™ grease and cooled to 30 mK in a dilution refrigerator. A three‑axis vector magnet enabled precise orientation of the magnetic field within the plane of the SQUID (*H*x,y), with an angular accuracy better than 0.1°. Low‑temperature *M(H)* curves were recorded at sweep rates between 0.001 and 0.128 T/s with a time-resolution of approximately 1 ms.

The well-defined triangular shape of the single micro‑crystals allows the measurement plane (*H*x,y) to be aligned with the Dy3 molecular plane. Owing to the nearly equilateral geometry, orienting one in‑plane field component (e.g., *H*x) parallel to a crystal edge places the external field along one of the Dy easy axes. Conversely, directing *H*x from the midpoint of one edge toward the opposing vertex aligns the field along a corner of the switching‑field hexagon, as established by the angular‑dependent magnetization maps presented in the main text. This geometric correspondence between the micro‑crystal shape and the molecular magnetic anisotropy enables a highly reproducible and symmetry‑selective control of field orientation. Eventually the vector-control of field-direction is crucial for a precise alignment in the measurement plane (*H*x,y) to a direction of choice, such as along the arm-center or the corner of the switching‑field hexagon. For measurements requiring access to out‑of‑plane orientations (see **section 5**), selected crystals were mounted vertically with respect to the in‑plane measurement axes (*H*x,y). Owing to the large aspect ratio of the thin triangular micro‑crystals, achieving stable vertical alignment is challenging and often requires the use of fine plastic-thread supports to hold the crystal securely.

1. **SQUID Measurements**

Table S4 Relaxation fitting parameters for **Dy3-Ph** in the temperature range of 1.9 to 3 K.9

| *T*  (K) | χS,Total  (cm3/mol) | Δχ1  (cm3/mol) | *τ*1  (s) | *α*1 | Δχ2  (cm3/mol) | *τ*2  (s) | *α*2 | Residual |
| --- | --- | --- | --- | --- | --- | --- | --- | --- |
| 1.9 | 0.16159 | 0.80682 | 0.00203 | 0.4138 | 0.17104 | 0.26712 | 1.2E-16 | 5.38536E-5 |
| 2.2 | 0.15864 | 1.16161 | 0.00175 | 0.40961 | 0.1433 | 0.2025 | 1.2E-17 | 1.18879E-4 |
| 2.5 | 0.26571 | 1.49832 | 0.00151 | 0.38885 | 0.12143 | 0.15475 | 1.2E-16 | 4.09062E-4 |
| 3 | 0.21238 | 2.01588 | 0.00119 | 0.35075 | 0.10256 | 0.11009 | 1.9E-12 | 5.83564E-4 |

Table S5 Relaxation fitting parameters for **Dy3-Ph** in the temperature range of 3.5 to 13 K.10-12

| *T*  (K) | *χ*S  (cm3/mol) | *χ*T  (cm3/mol) | *τ*  (s) | *a* | Residual |
| --- | --- | --- | --- | --- | --- |
| 3.5 | 0.21344 | 2.82337 | 9.26232E-4 | 0.37983 | 0.00973 |
| 4 | 0.29991 | 3.19904 | 7.55784E-4 | 0.36235 | 0.00478 |
| 4.5 | 0.36083 | 3.44977 | 6.44125E-4 | 0.35464 | 0.00716 |
| 5 | 0.38201 | 3.60184 | 5.26389E-4 | 0.35132 | 0.00619 |
| 6 | 0.51848 | 3.69757 | 4.04838E-4 | 0.33485 | 0.00577 |
| 7 | 0.44416 | 3.63361 | 2.82805E-4 | 0.32478 | 0.00608 |
| 8 | 0.50759 | 3.49231 | 2.17396E-4 | 0.30601 | 0.00627 |
| 9 | 0.49872 | 3.33049 | 1.62235E-4 | 0.29665 | 0.00704 |
| 10 | 0.65042 | 3.15157 | 1.35859E-4 | 0.25863 | 0.00179 |
| 11 | 0.69899 | 2.98759 | 9.89002E-5 | 0.26012 | 0.00529 |
| 12 | 0.81624 | 2.83017 | 7.54335E-5 | 0.23401 | 0.00602 |
| 13 | 0.60459 | 2.68092 | 6.06293E-5 | 0.21267 | 0.00377 |


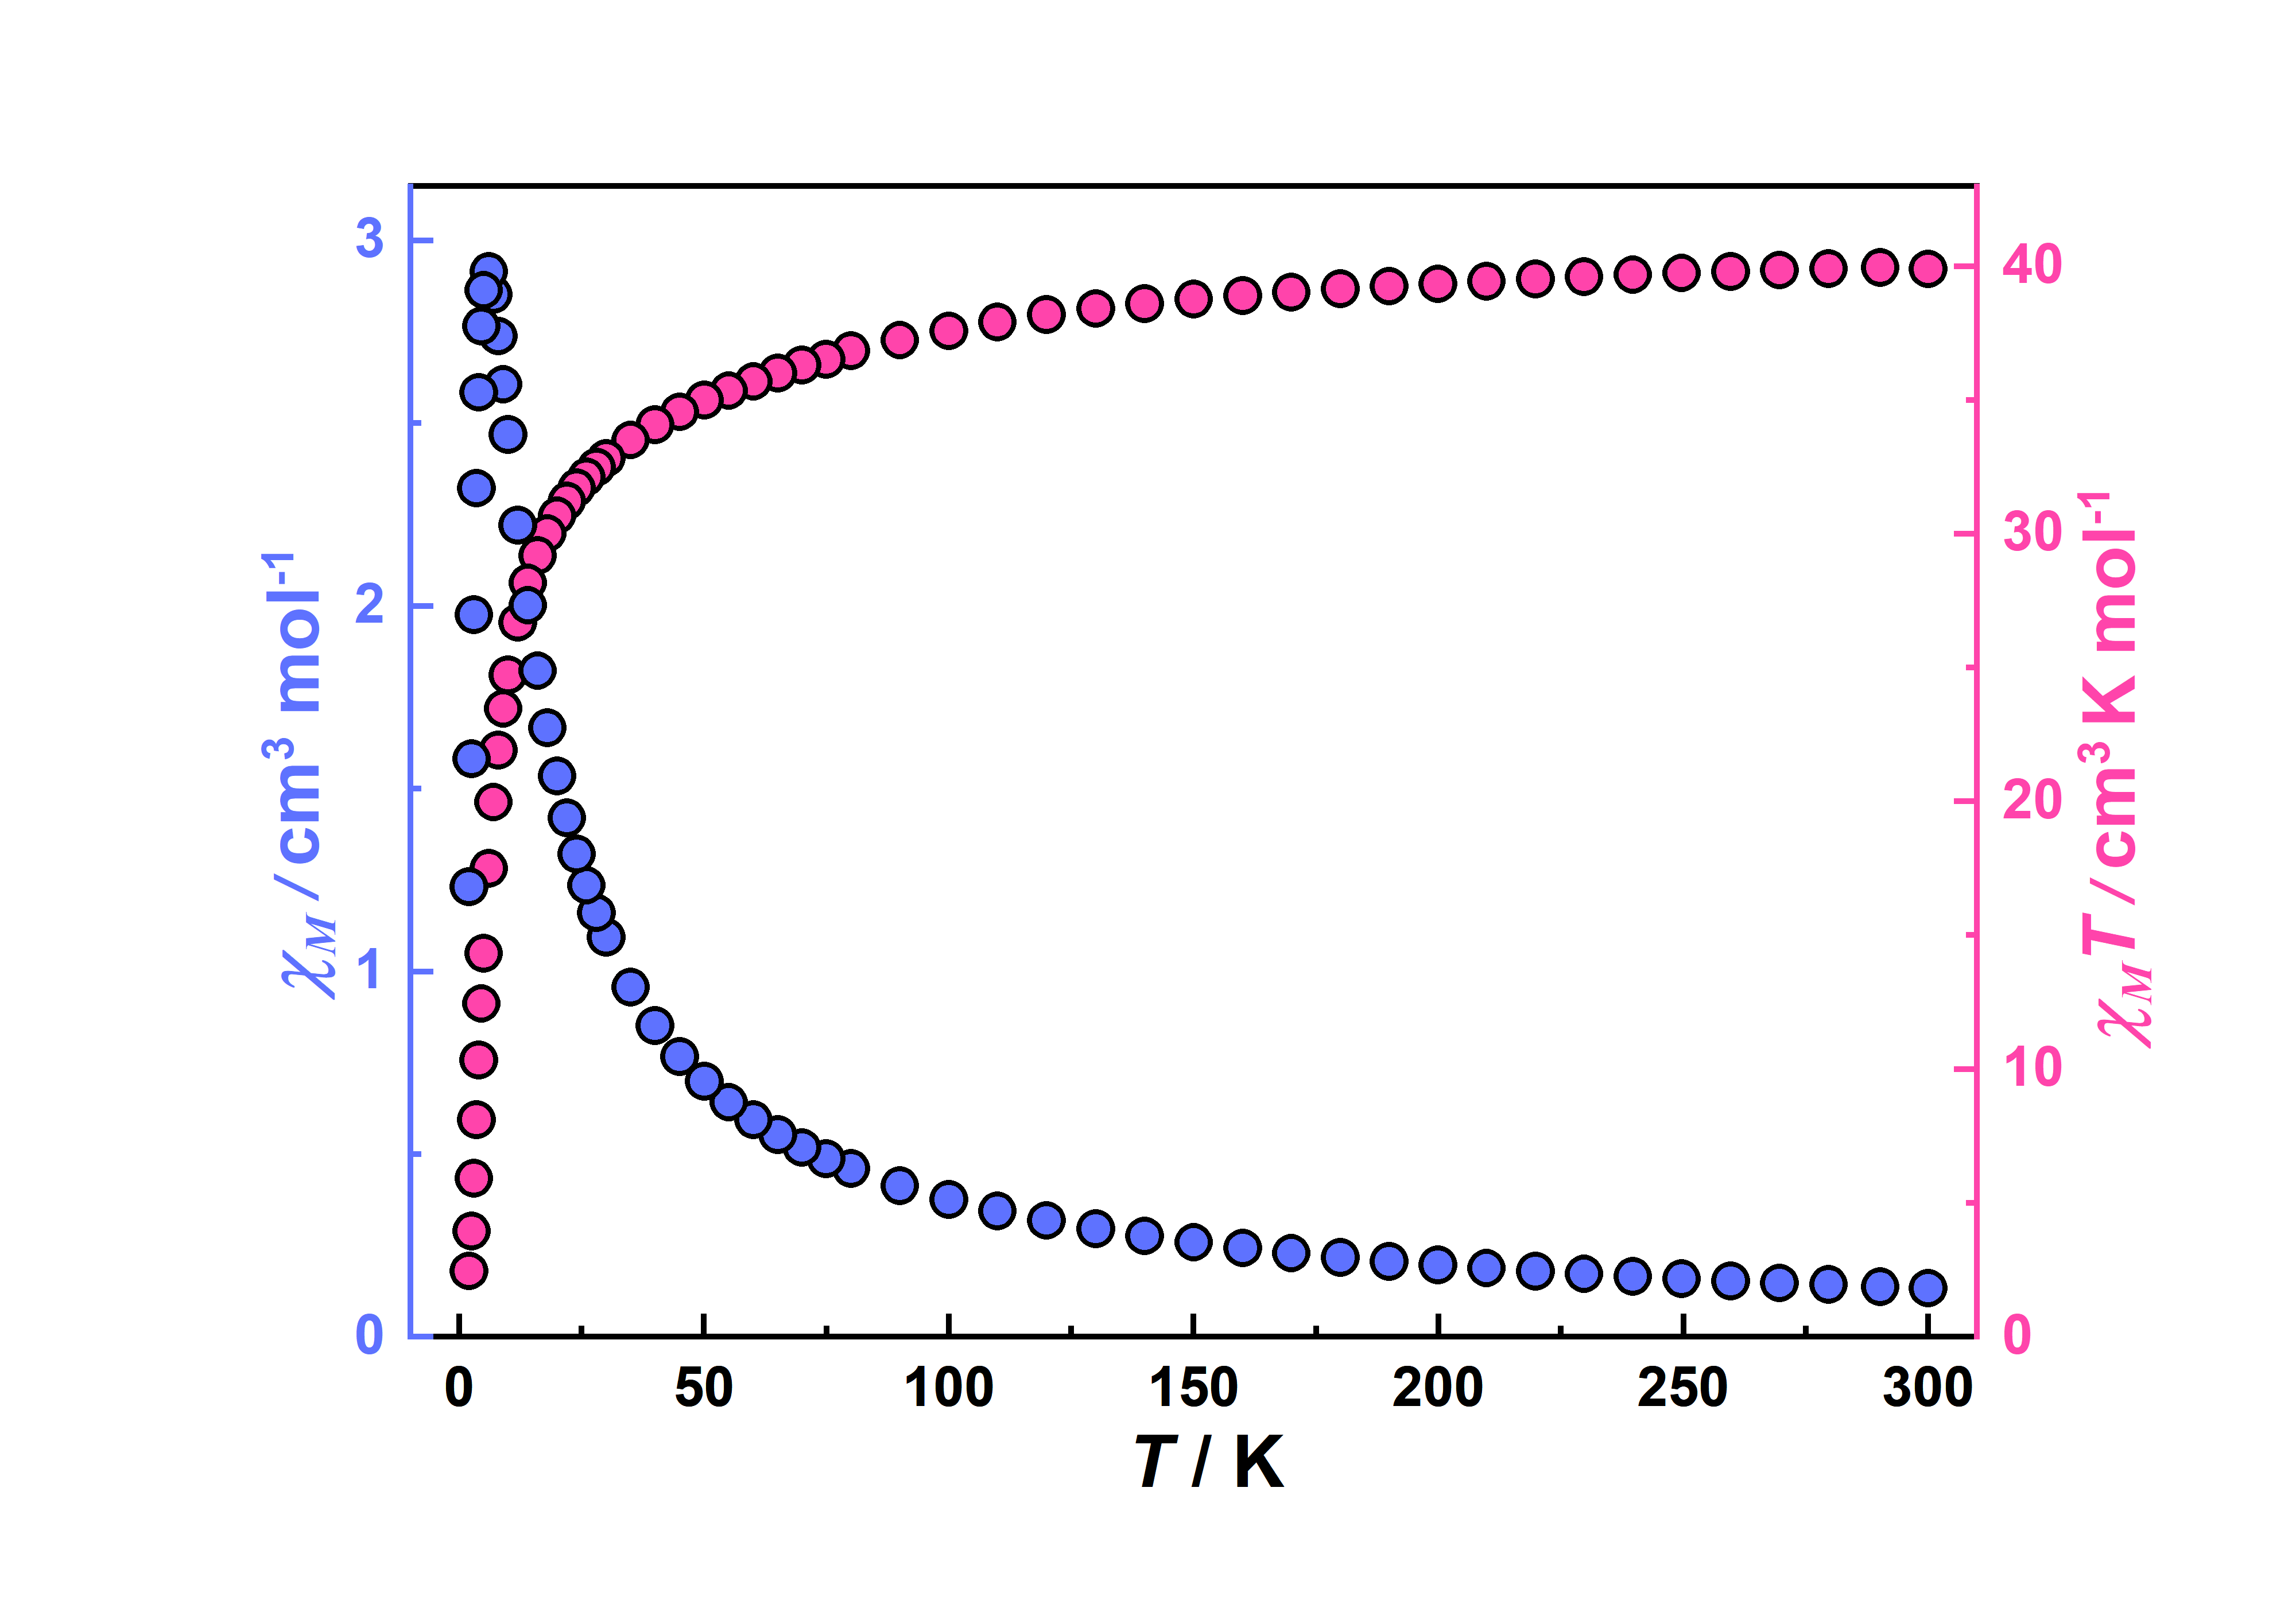


Figure S8. Temperature-dependent *χM*(*T*) (left y-axis, blue circles) and *χMT*(*T*) (right y-axis, pink circles) plots for **Dy3-Ph** under an applied field 1000 Oe.


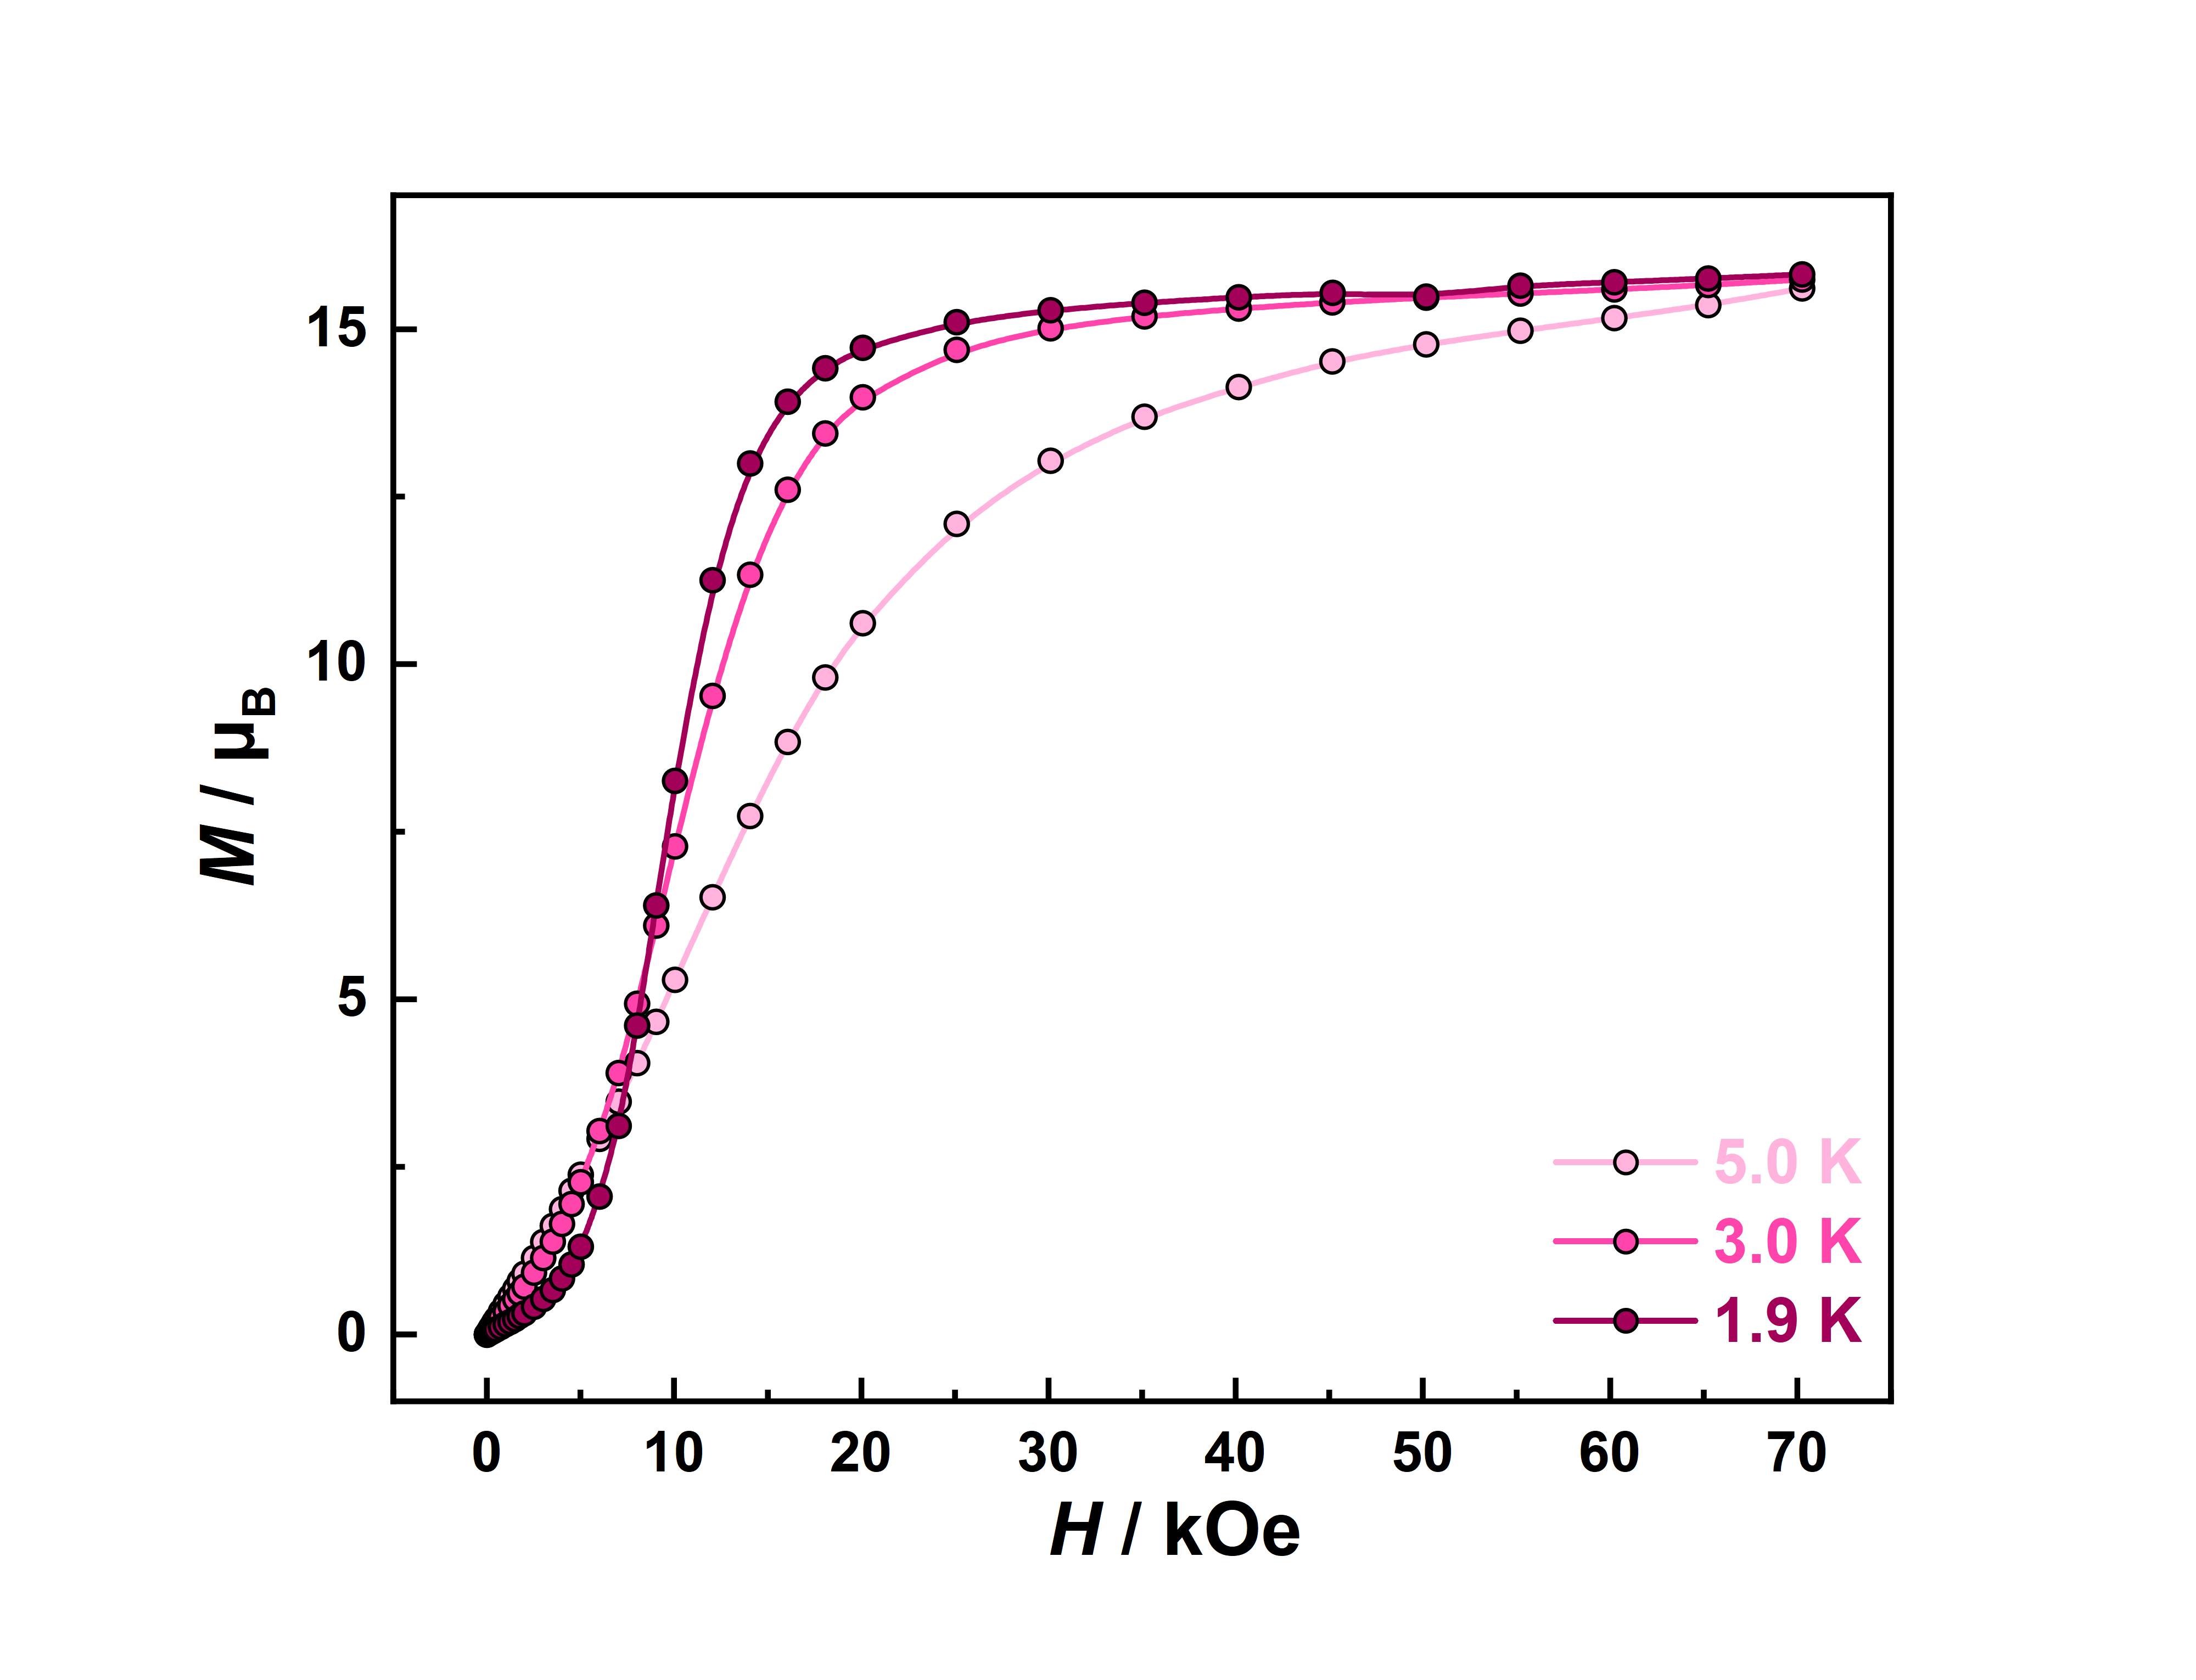


Figure S9. Field dependence of the magnetization at 1.9, 3.0 and 5.0 K for **Dy3-Ph**.


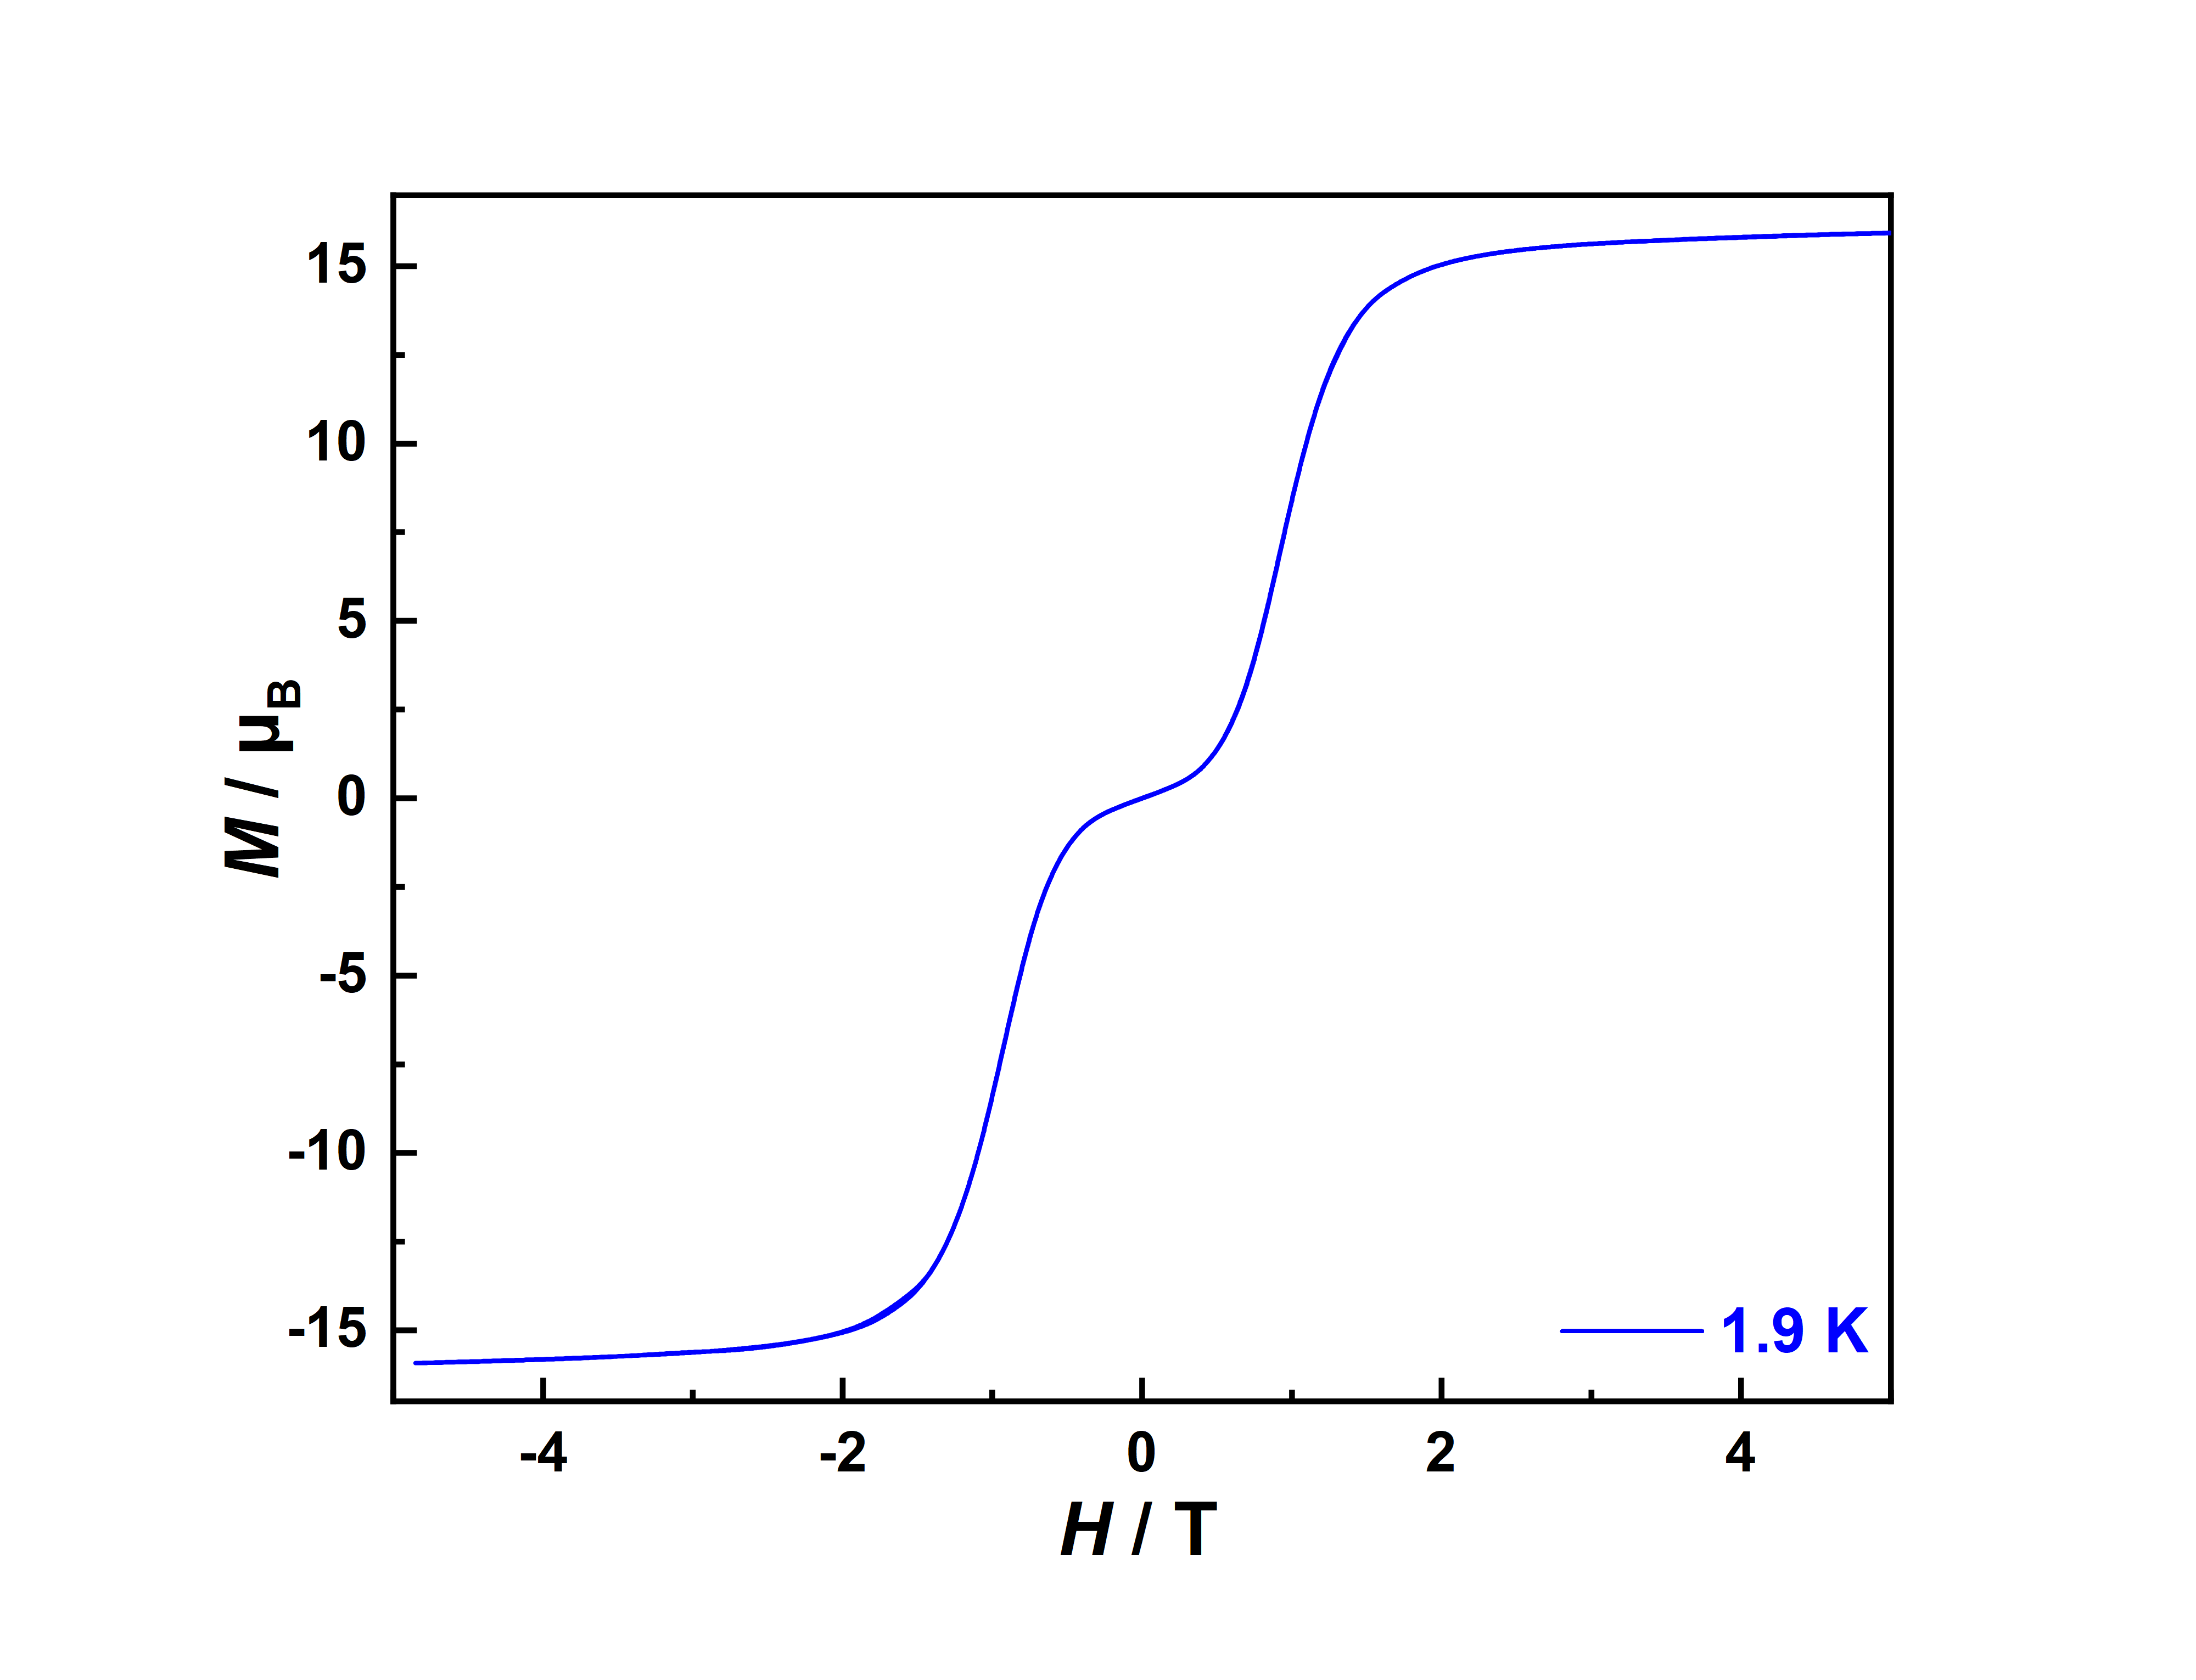


Figure S10. Magnetic hysteresis measurement at 1.9 K for **Dy3-Ph**.


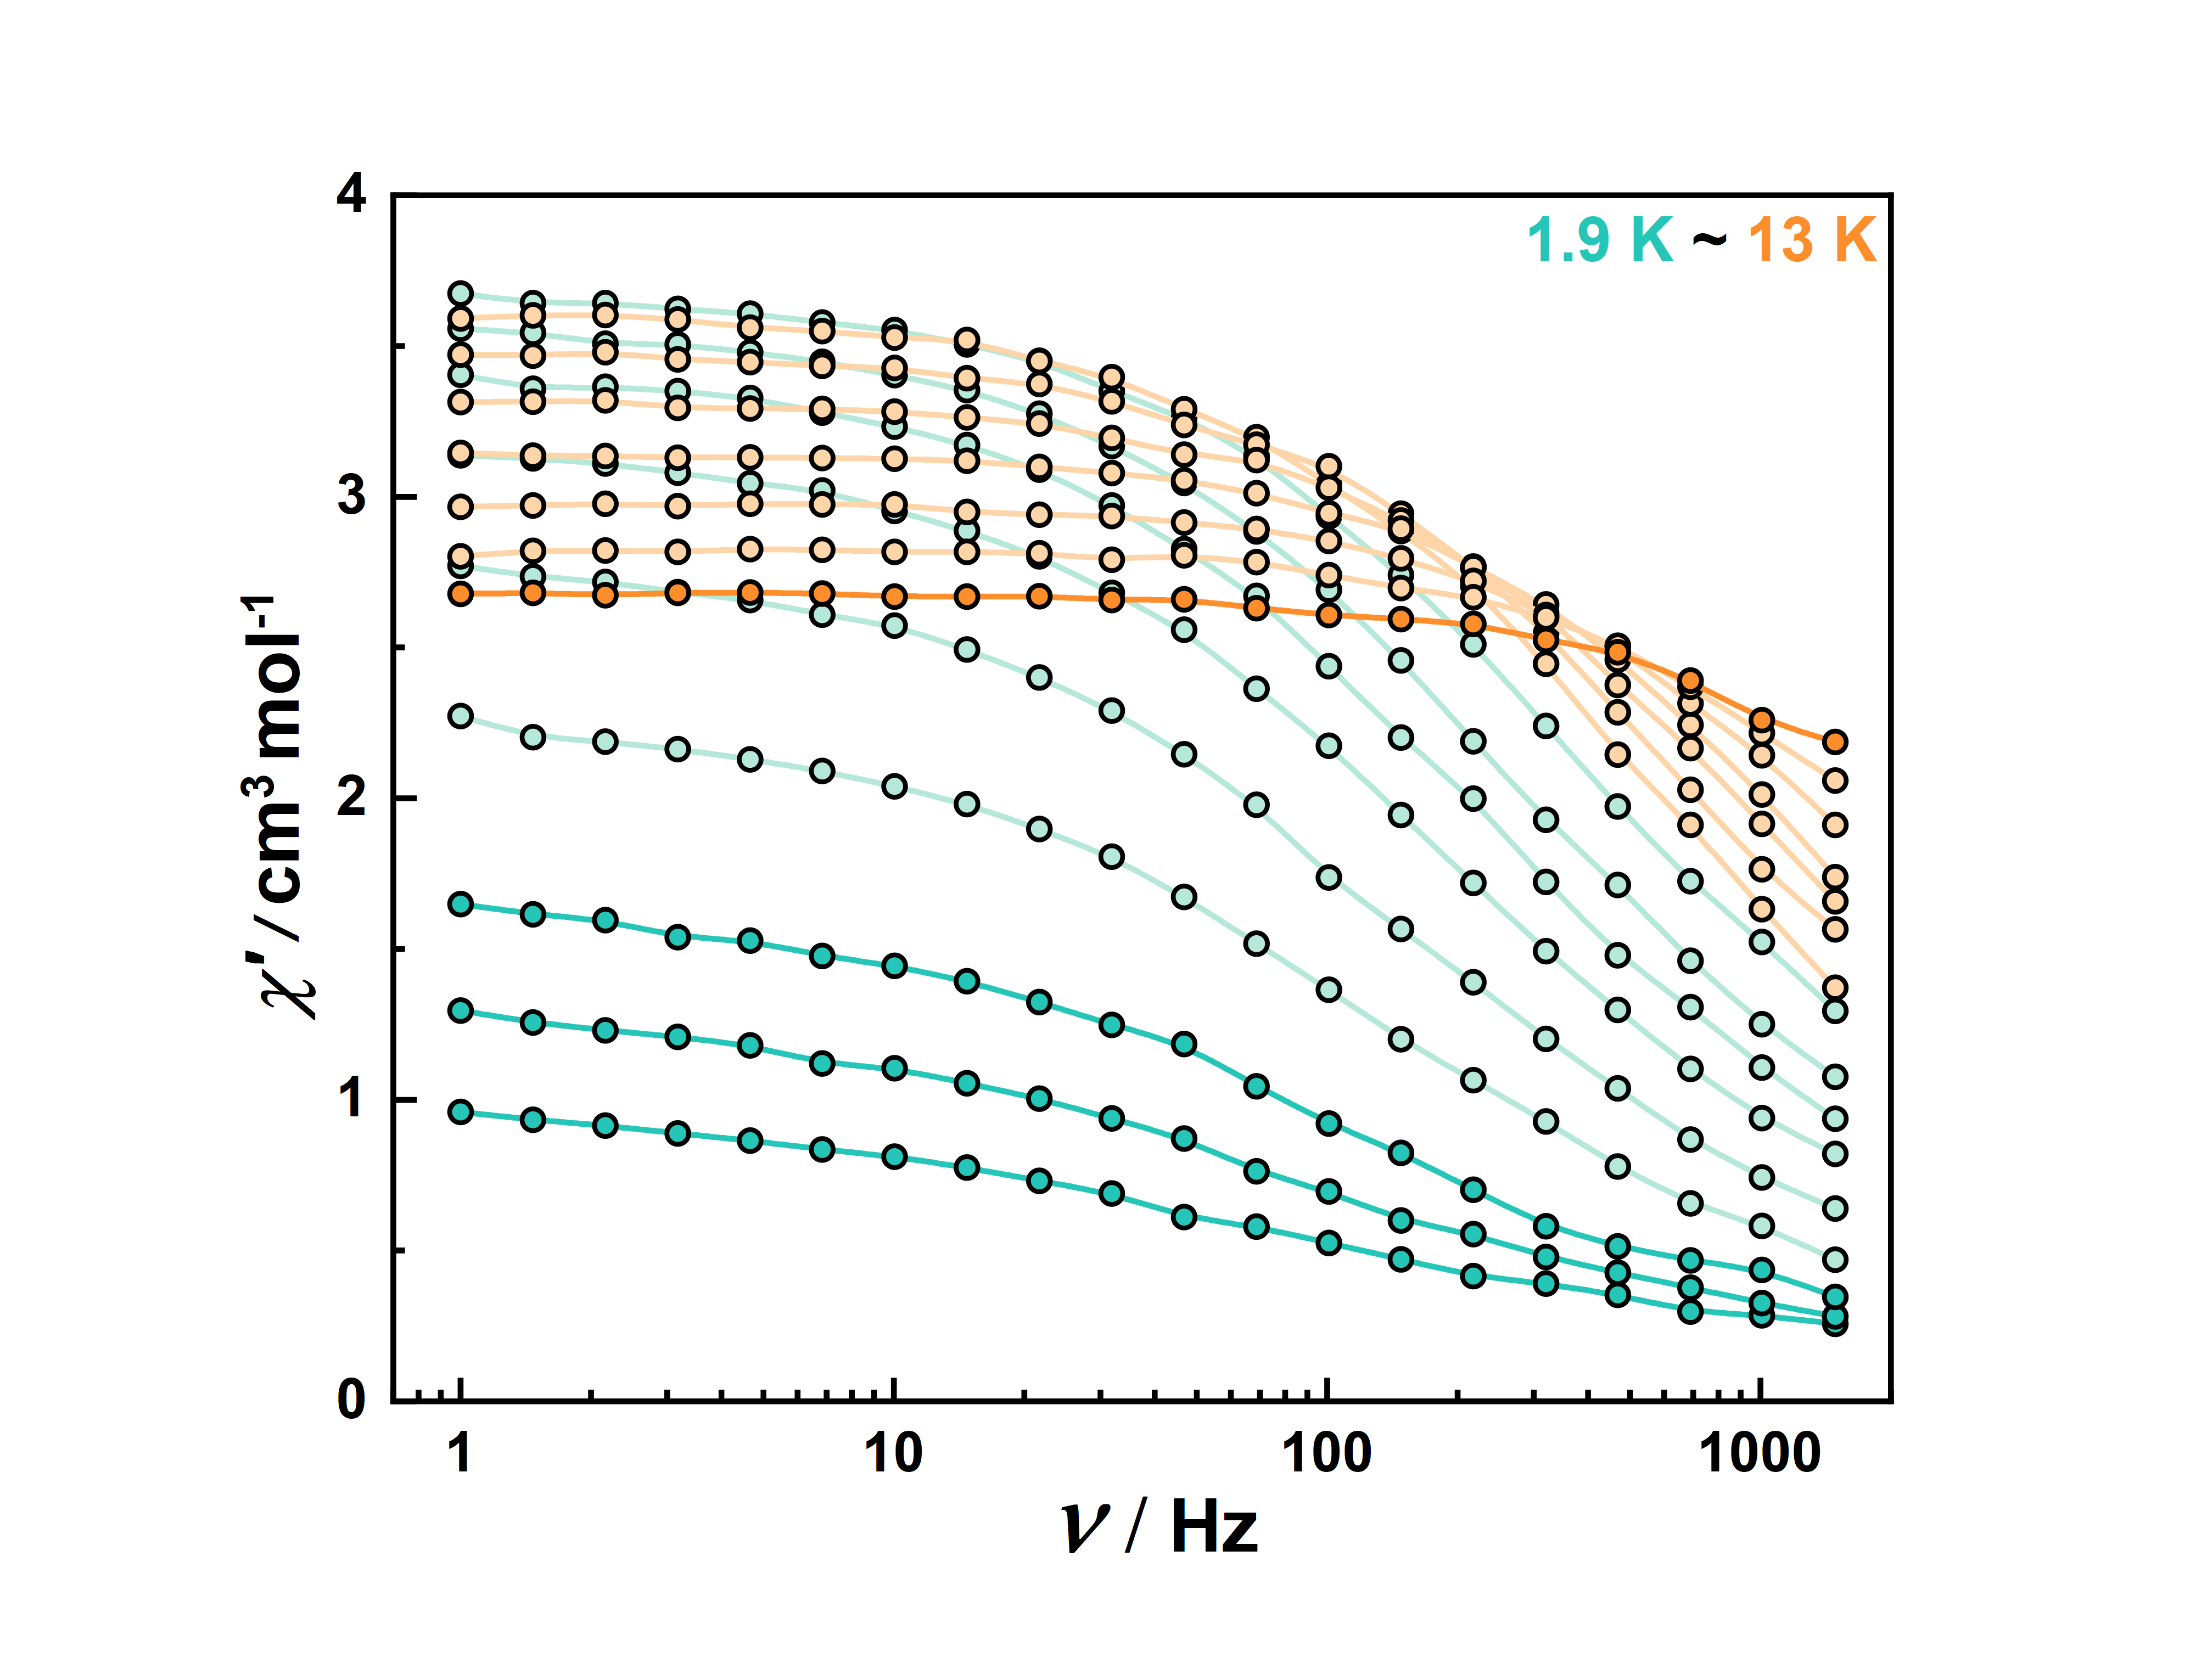


Figure S11. Frequency dependence of the in-phase component of the ac susceptibility for **Dy3-Ph** at the temperatures shown. Data were collected in an ac field of 3 Oe and a zero-dc field. The colored lines are guides for the eye.


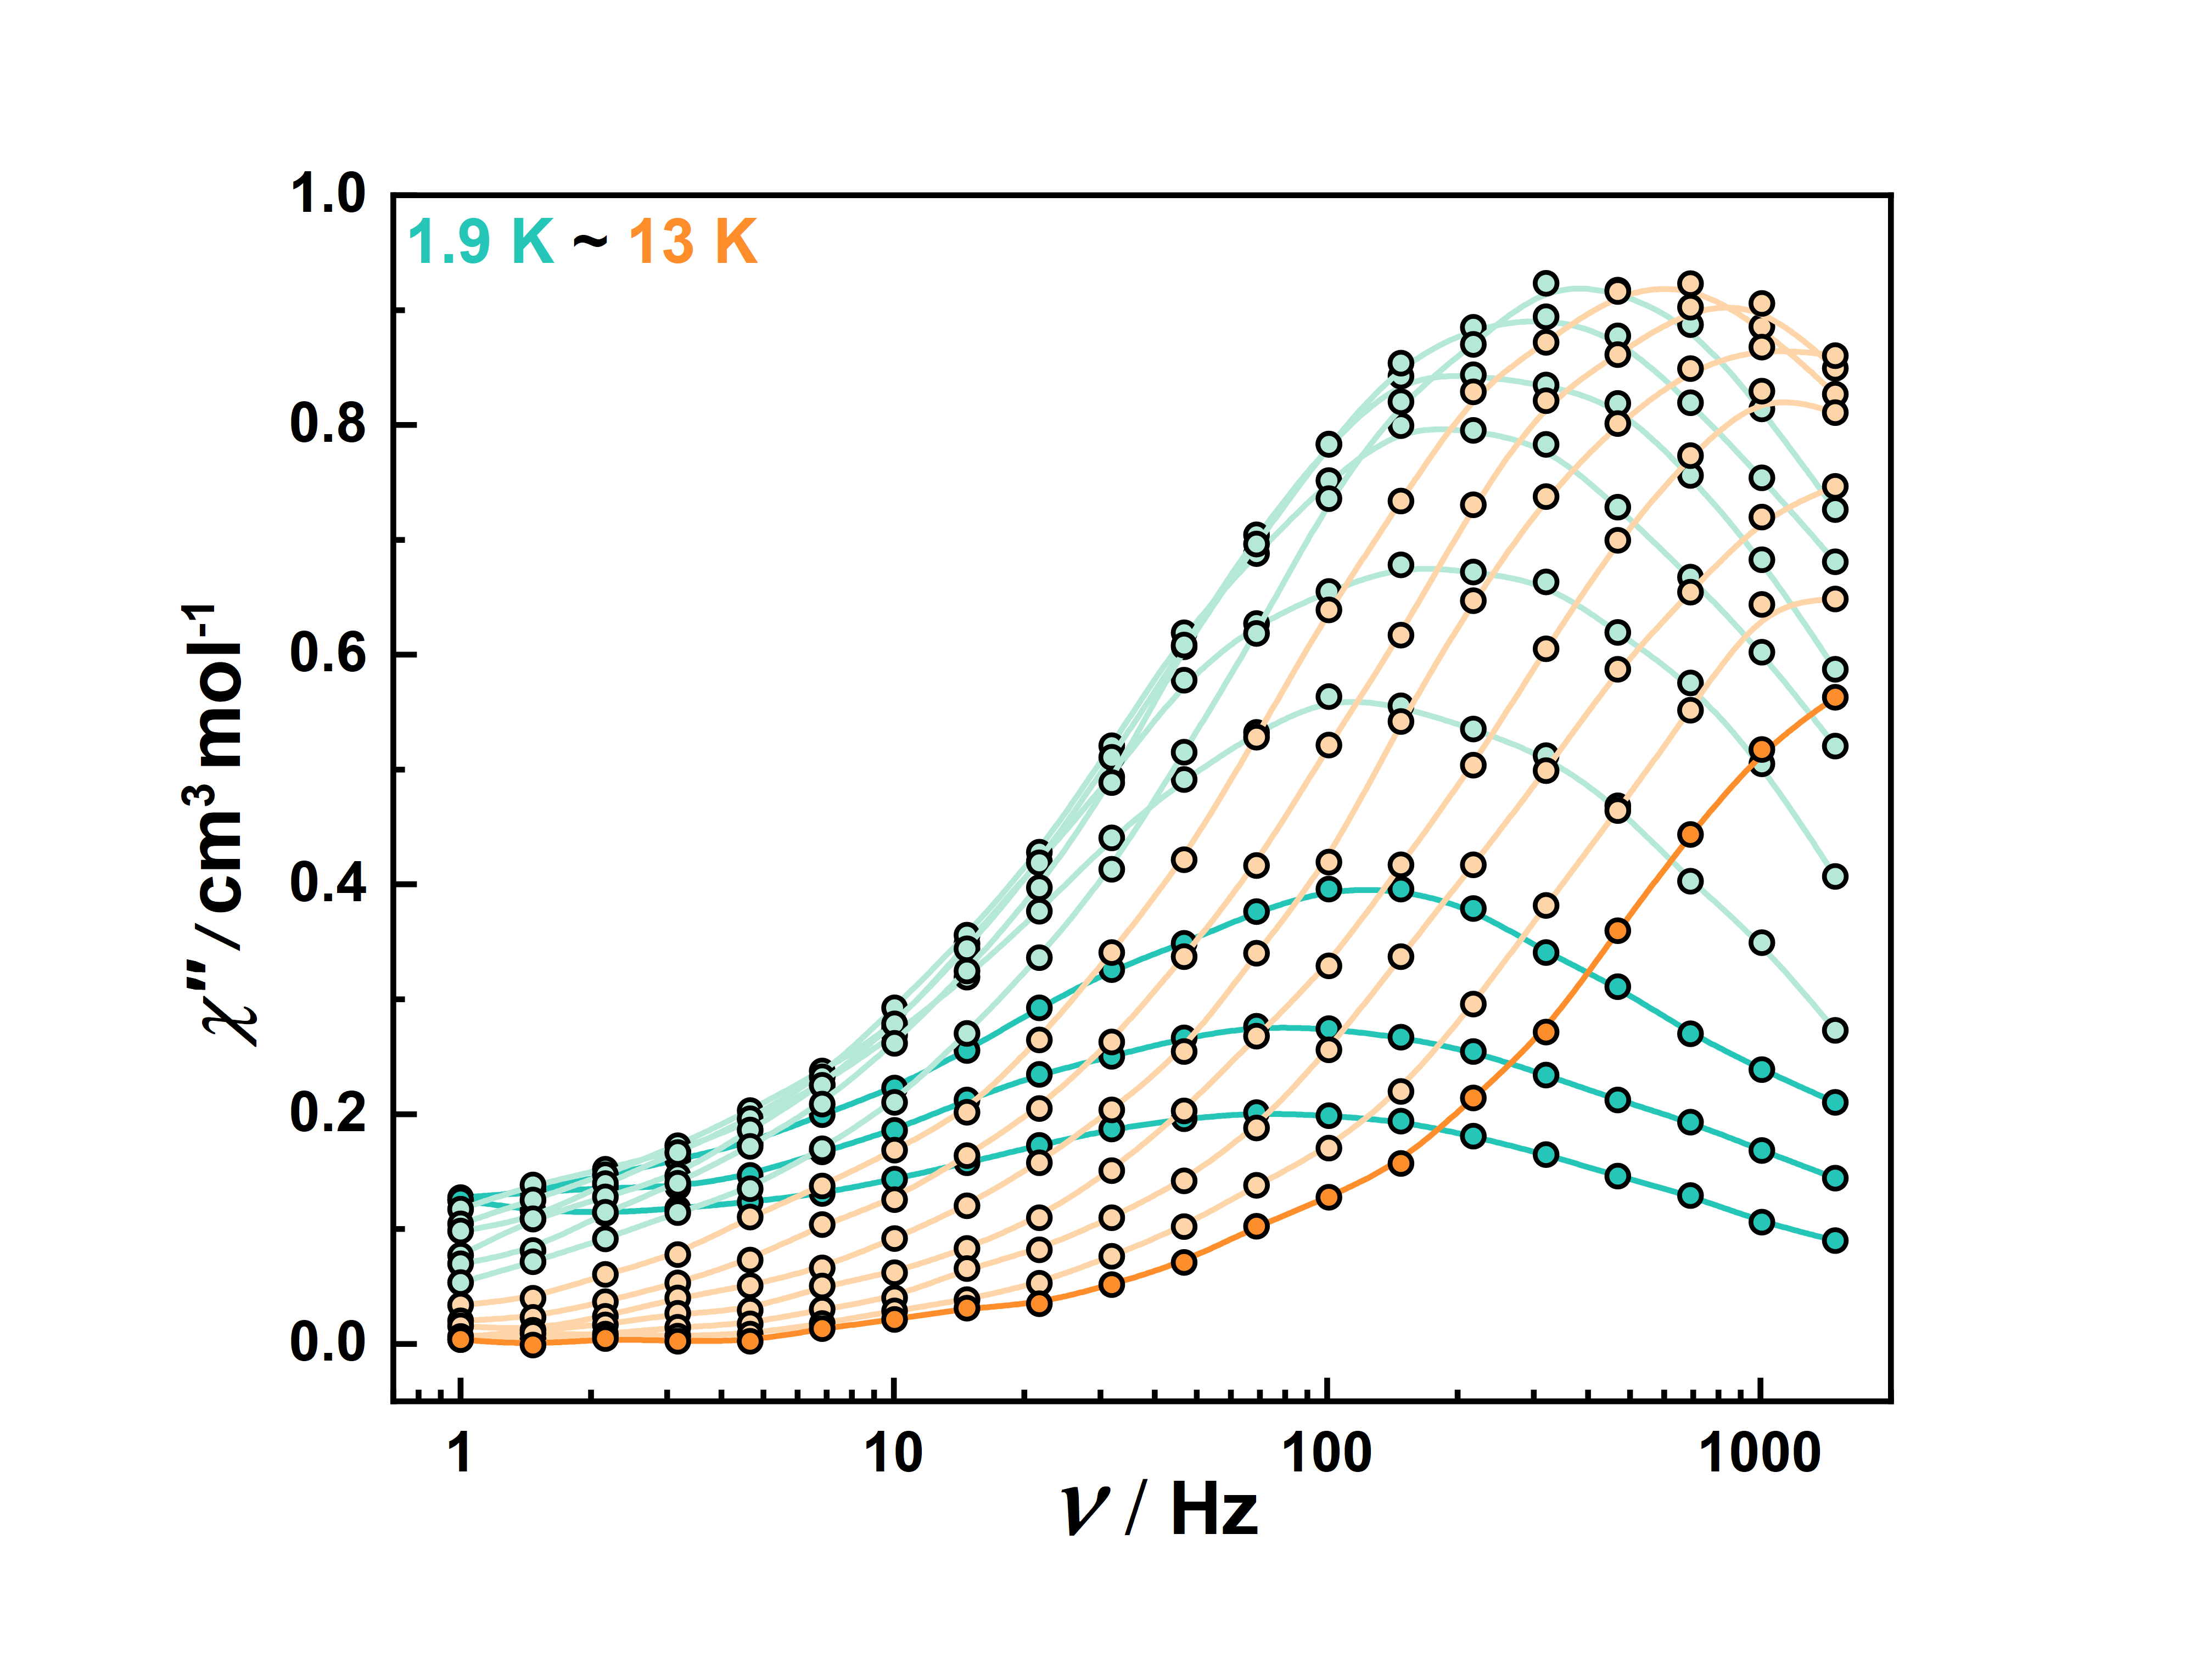


Figure S12. Frequency dependence of the out-of-phase component of the ac susceptibility for **Dy3-Ph** at the temperatures shown. Data were collected in an ac field of 3 Oe and a zero-dc field. The colored lines are guides for the eye.


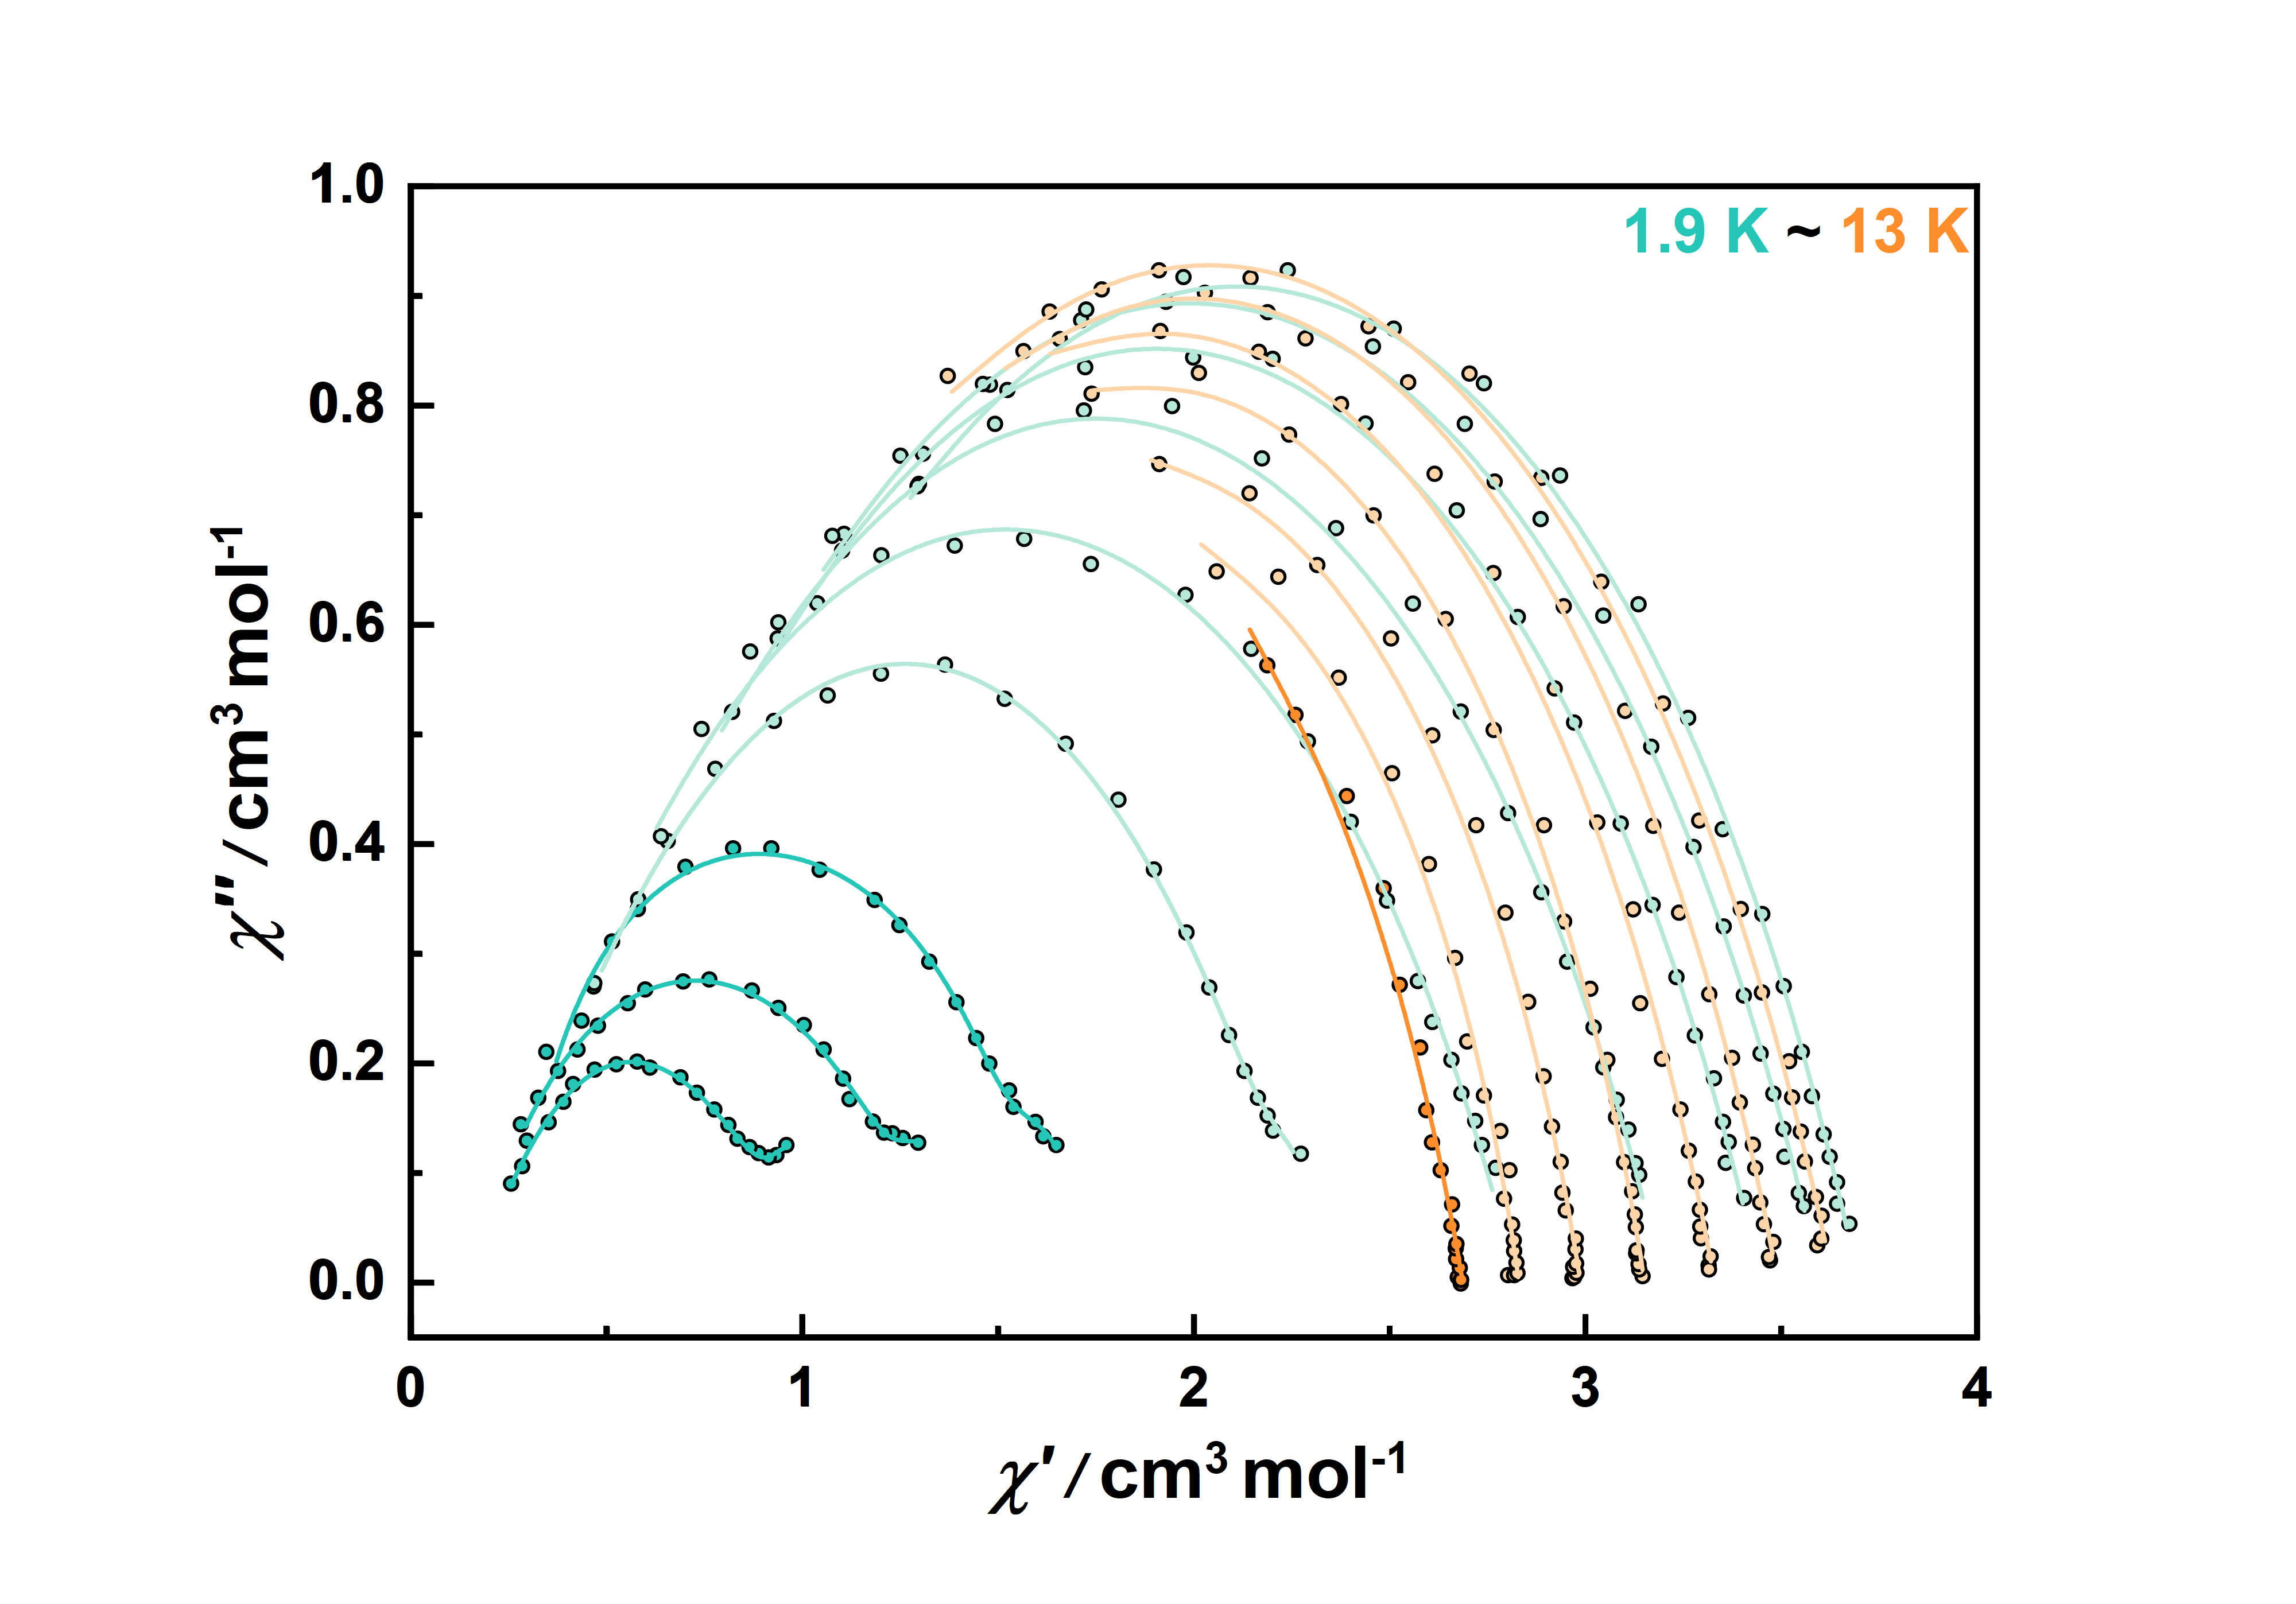


Figure S13. Cole-Cole plots for the ac susceptibility in zero-dc field for **Dy3-Ph** from 1.9–13 K. Solid lines represent the fits to the data using the parameters described in the text.


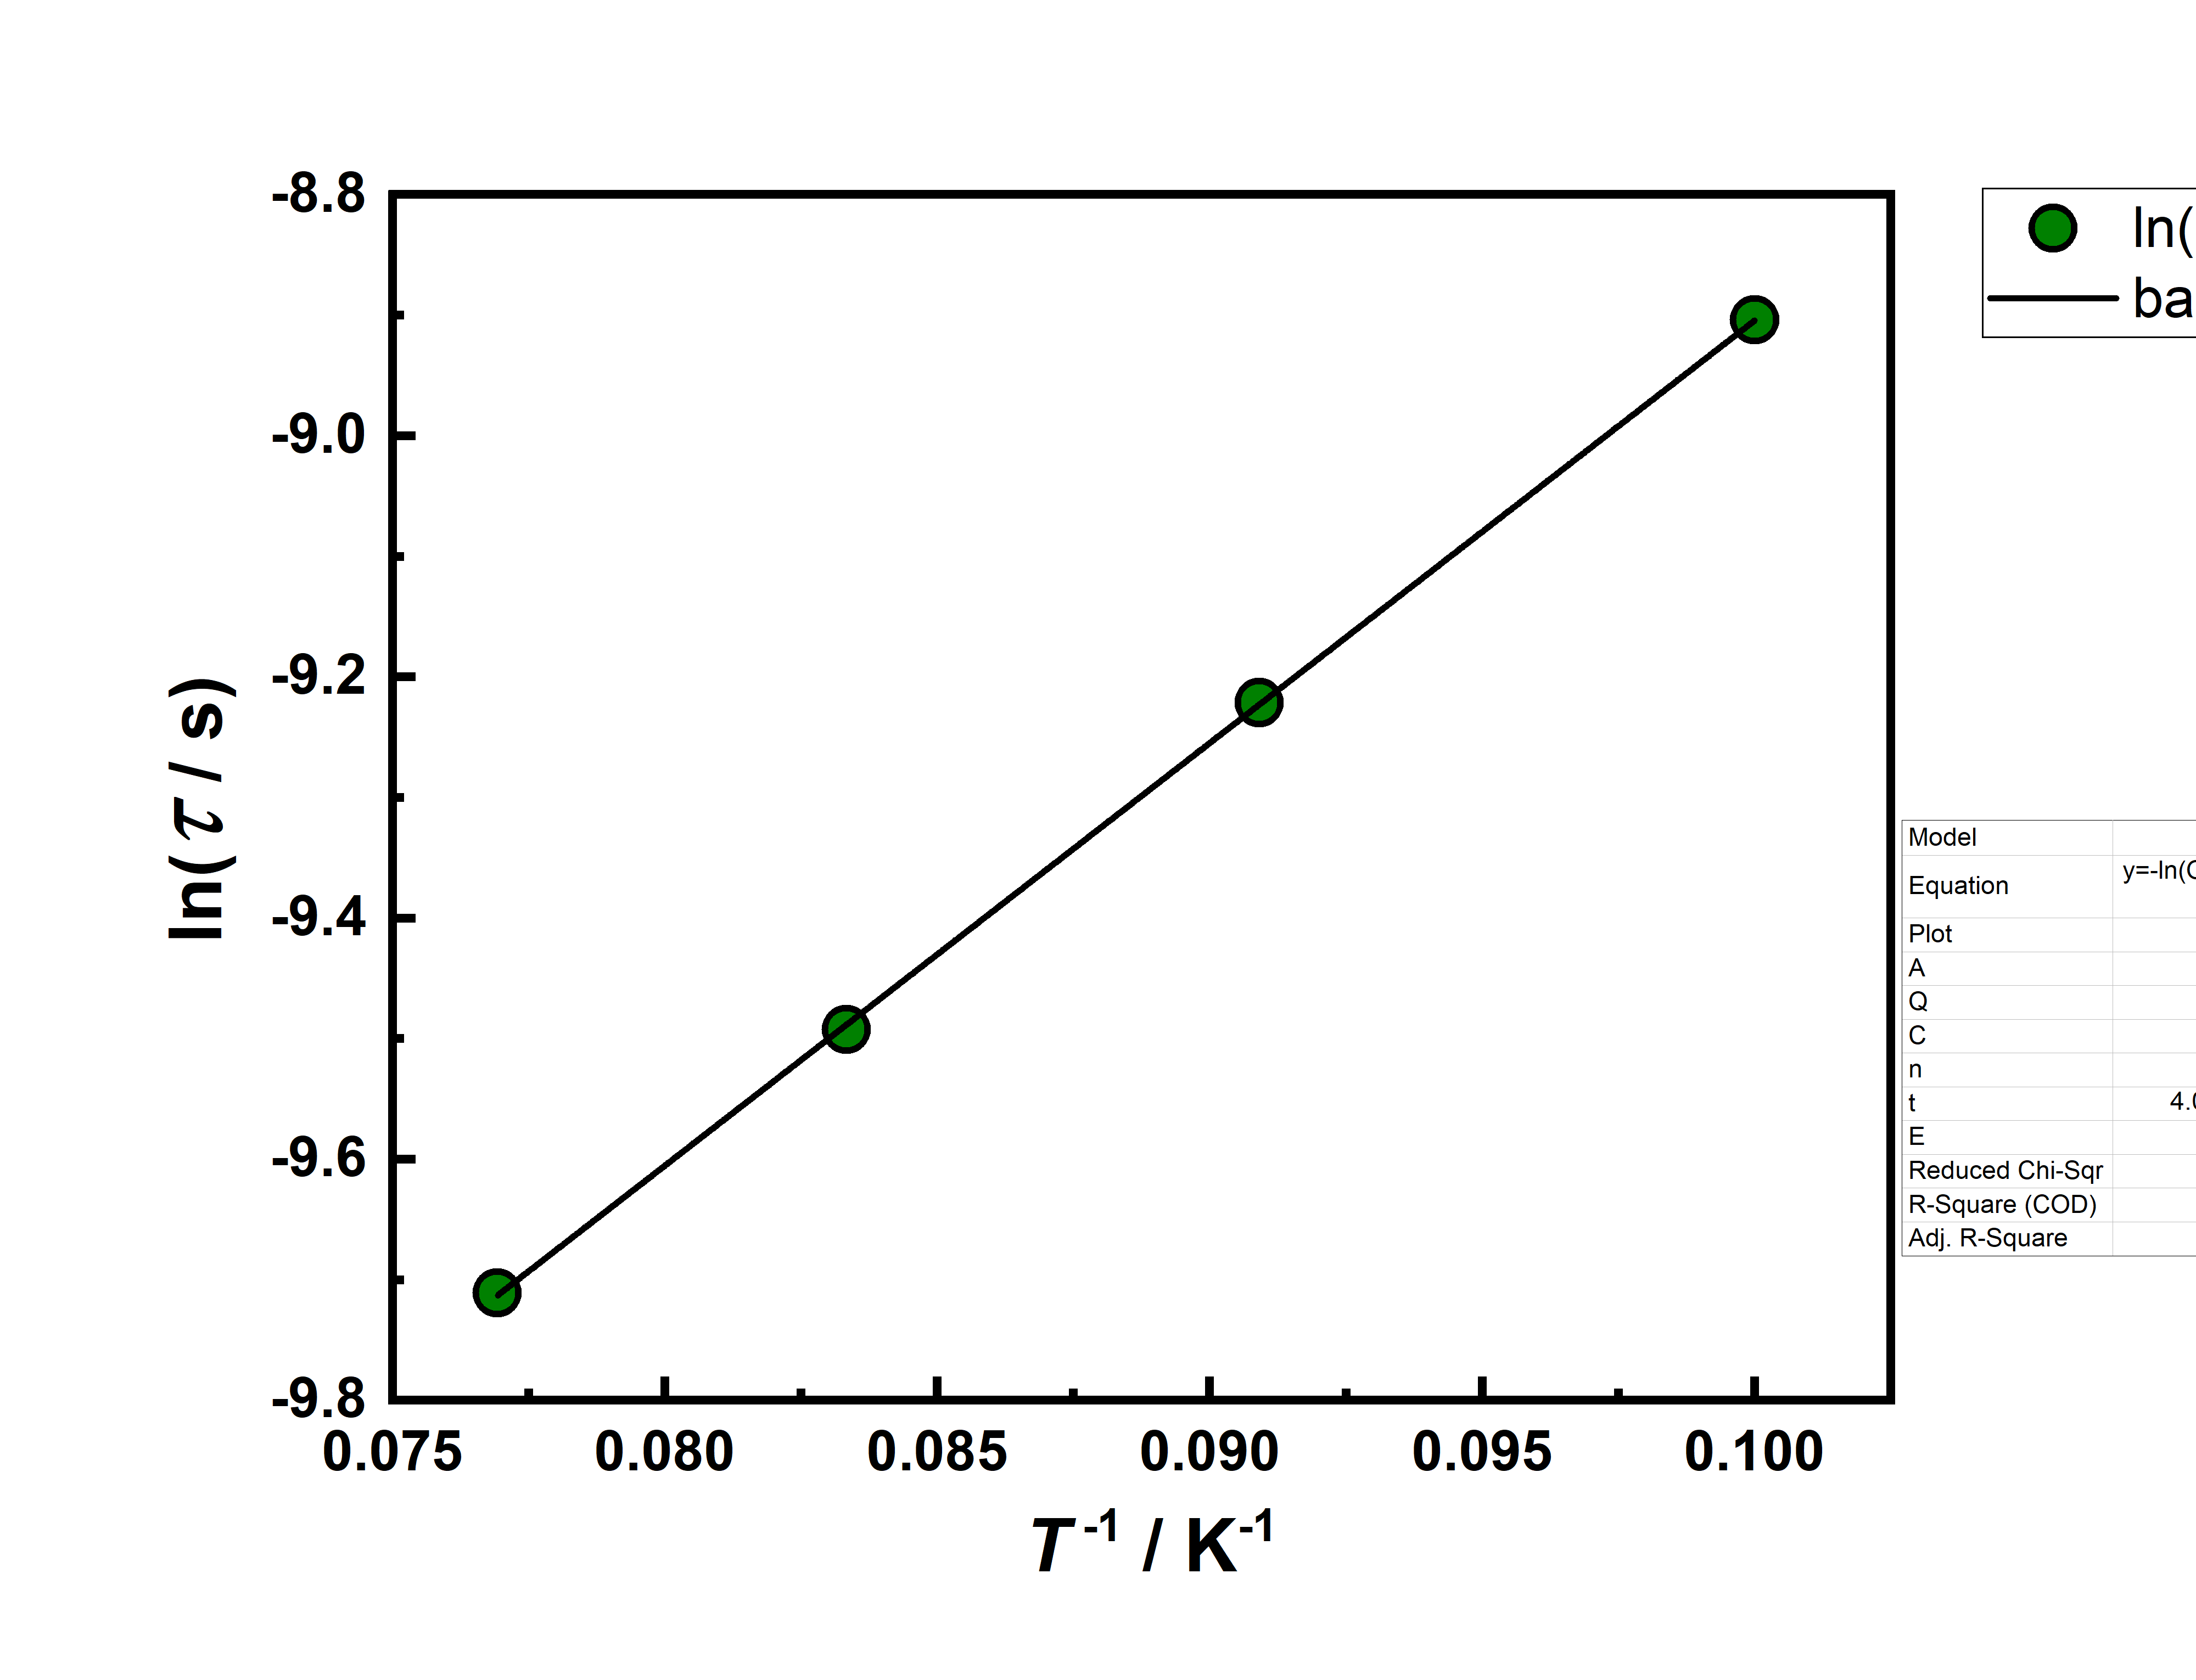


Figure S14. Temperature dependence of the magnetic relaxation times for **Dy3-Ph** plotted as ln(*τ*) versus *T*-1. The black line represents the fit to Arrhenius equation ln(*τ*) = -ln[*τ*0-1 exp(-*U*eff/*k*B*T*)], giving *U*eff = 35.1(3) K and *τ*0 = 4.1(1) × 10-6 s.

1. **Supporting μSQUID Measurements:**

**

**

Figure S15. (a)-(c) *M*(*H*x) loops for single crystal of **Dy3-ph** at different temperatures (0.03 K – 5.0 K) with field-sweep rate = 16 mT/s, for three different crystal-orientations with respect to the applied field (*H*x). These measurements correspond to the crystal orientations in **Figure 4 (a)-(c)** in the main text.

**
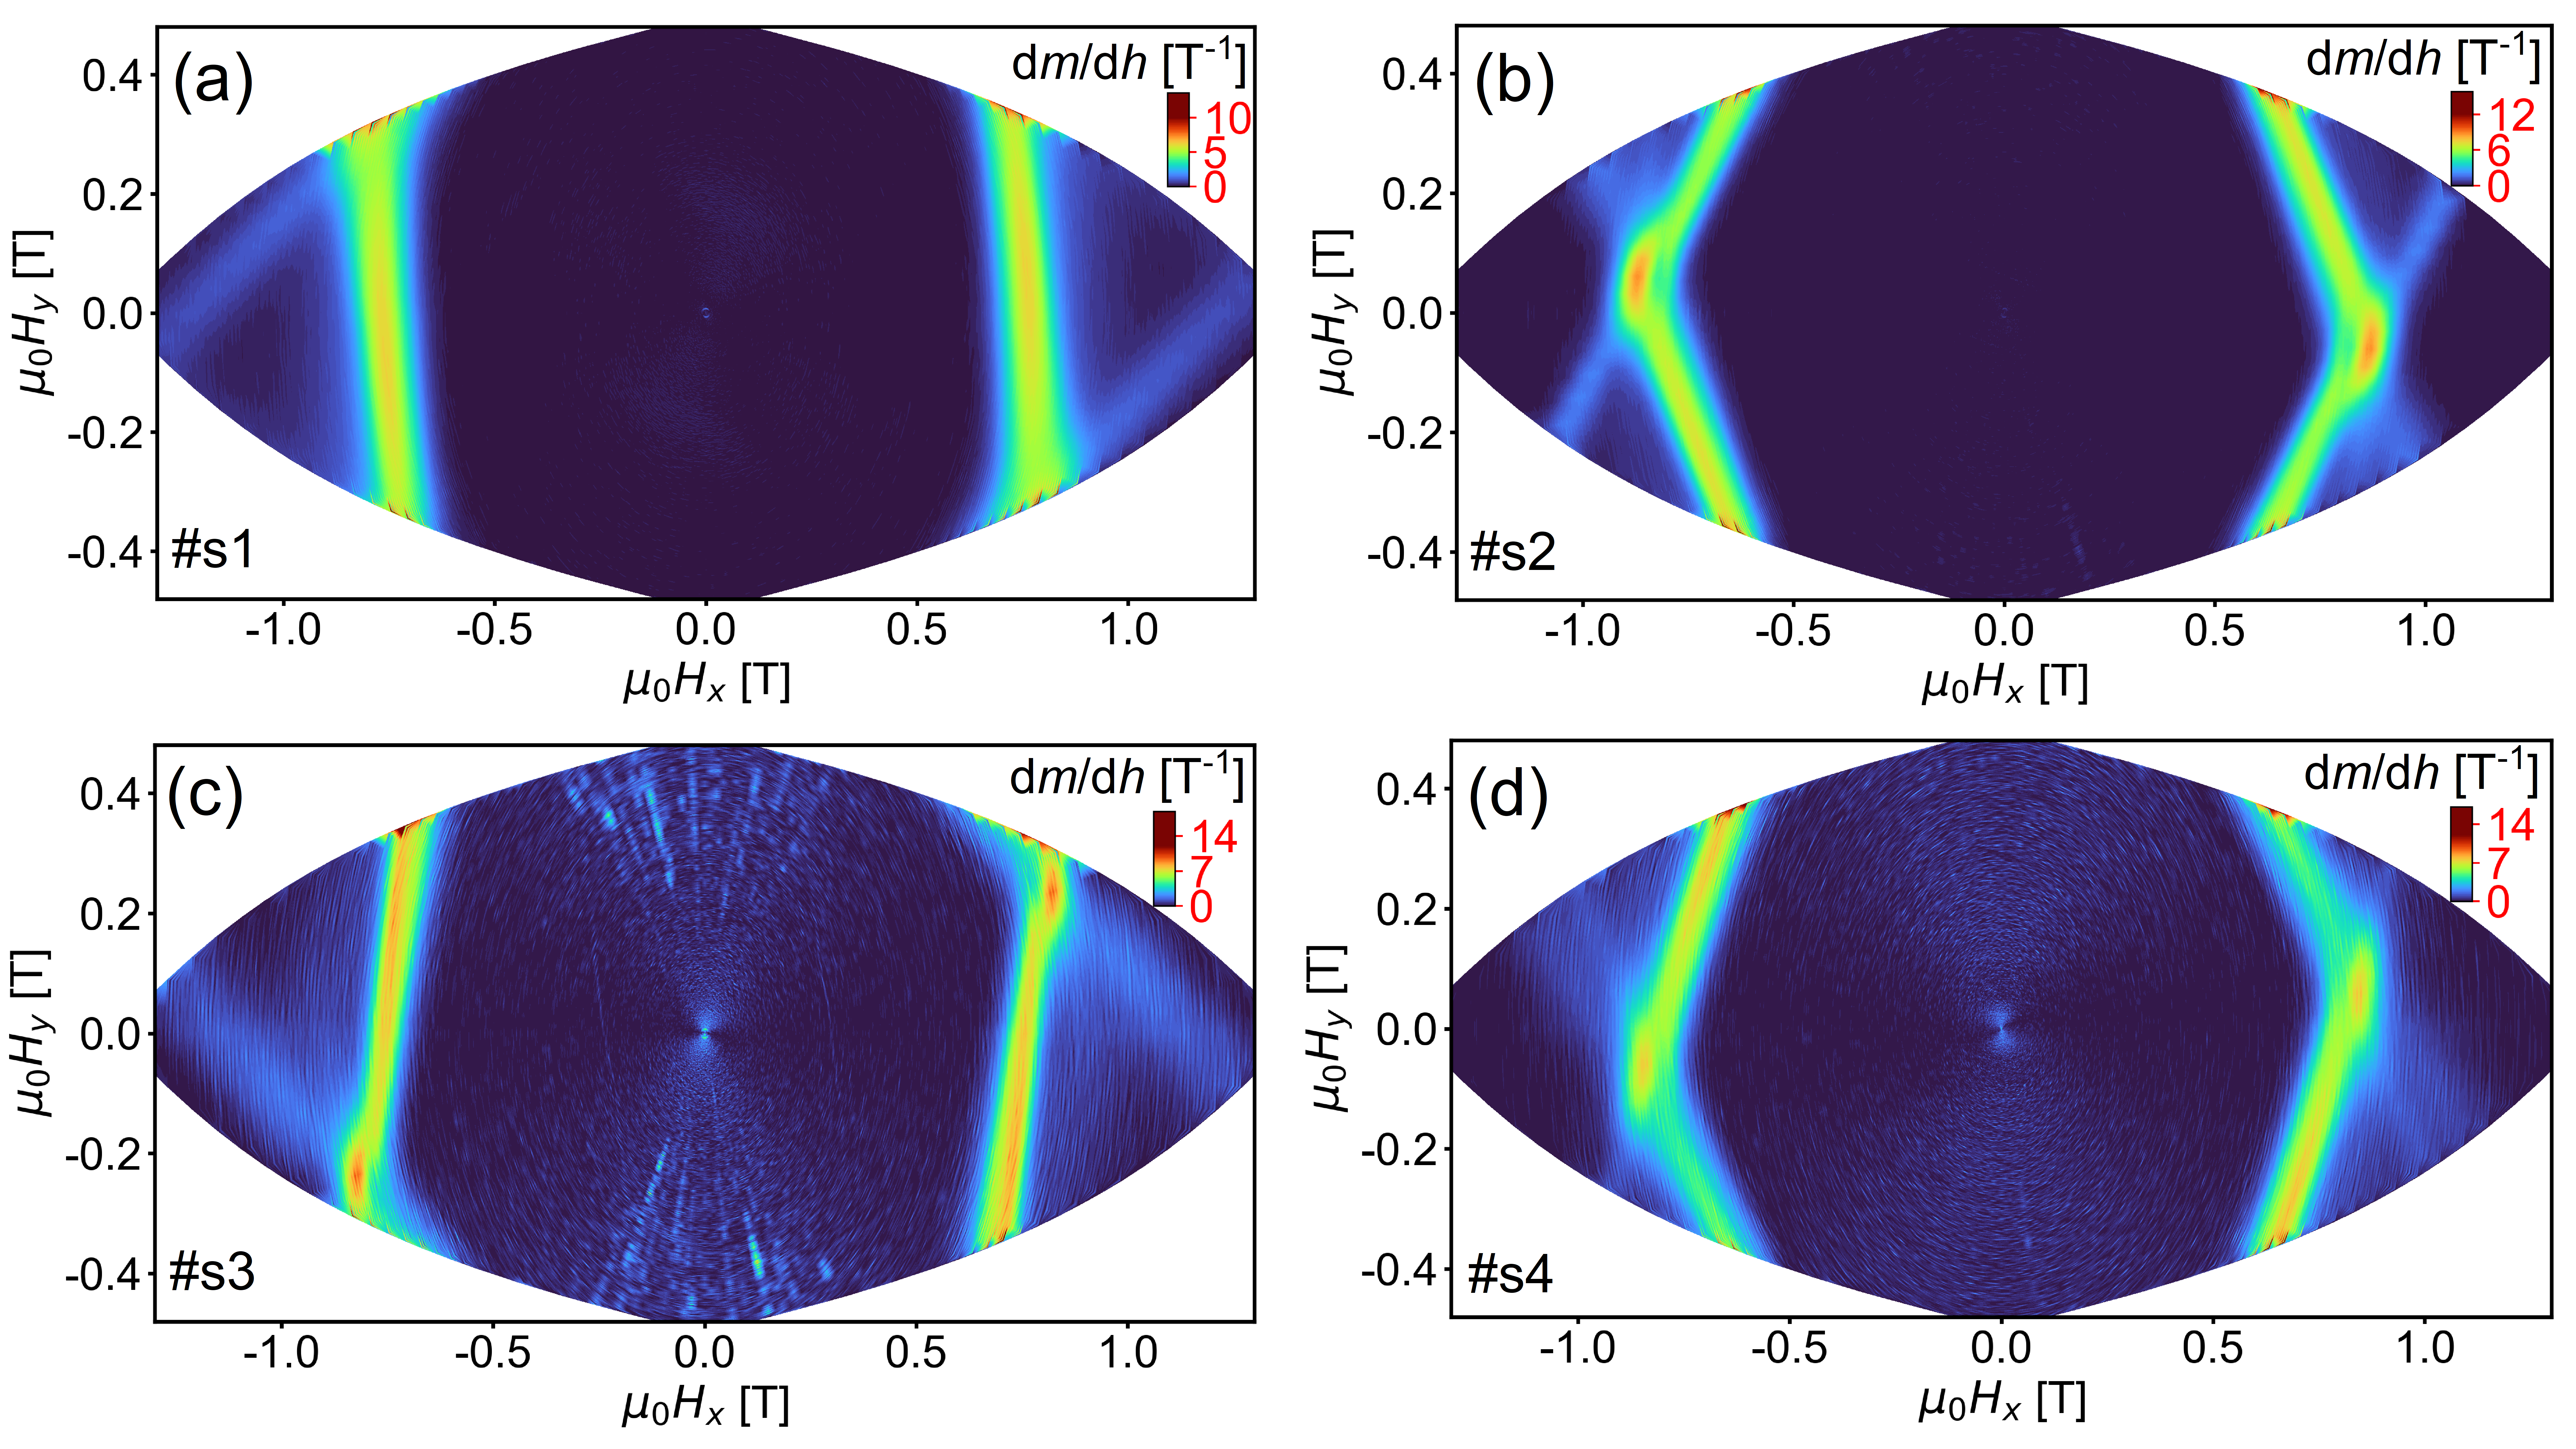
**

Figure S16. (a)-(d) Field-angle dependent derivative maps (d*m*/d*h* = d*M*/d*H*) reproduced in four other crystals (#s1-4) of the same sample. All four measurements represent ‘in-plane’ variation of vector magnetic field (*H*x,y). (a), (c) had *H*x nearly aligned with a Dy easy axis (i.e. along the ‘hexagon-arm’ or *φ* ~ 0°), while (b), (d) had *H*x nearly aligned with ‘hexagon-corner’ (*φ* ~ 30°).

**

**

Figure S17. (a), (b) Field-angle dependent derivative maps (d*m*/d*h* = d*M*/d*H*) in vertically mounted crystals (#s5-6) to show in-plane to out-of-plane variation of magnetic field. As the dominant anisotropy axis lie within a plane, the magnetic reversal (switching) of individual Dy spins is impossible (at such low temperatures) along out-of-plane direction, hence the parallel lines are observed as the field is varied in-plane to out-of-plane. This leads to a 3D switching‑field‑anisotropy surface that corresponds to a hexagonal prism, with the extended arms of the hexagon extruded along the z (out-of-plane) direction. Depending on the in‑plane field orientation, the spacing between the parallel features in the derivative maps increases or decreases accordingly.

1. **Ab-initio calculations**

*ab* *initio* calculations using the CASSCF/SO-RASSI/SINGLE_ANISO approach implemented in OpenMolcas13,14 were carried out.For the calculations, the crystal structure was employed without further optimizations, and the atoms were described using the standard basis sets from the ANO-RCC library15,16. Due to the presence of a single Dy(III) ions in the asymmetric unit, the dilution method was employed, where the Dy(III) ion of interest was investigated while the remaining Dy(III) were swapped with Y(III) for the computations. A basis set of VTZP quality was employed for the Dy(III) ions, while VDZP quality was employed for atoms directly bound to the Dy(III) ions, and VDZ quality for the remaining atoms, using the second-order DKH transformation. Optimization of the molecular orbitals (MOs) was achieved by state-averaged CASSCF calculations. The active space of Dy(III) was defined by the nine 4f electrons in the seven 4f orbitals. Three calculations were carried out (RASSCF routine) with 21, 224, and 490 states for *S* = 5/2, *S* = 3/2, and *S* = ½, respectively. The CASSCF wavefunctions were subsequently mixed by spin-orbit coupling, employing the RASSI17 routine with all 21 states for *S* = 5/2 being included, while 128 and 130 states were included for *S* = 3/2 and *S* = 1/2. Lastly, the crystal field decomposition of the ground *J* = 15/2 multiplet of the 6H15/2 term was executed with the SINGLE_ANISO module18,19.

**Table 6.** Computed energy levels (the ground state is set at zero), composition of the g-tensor (gx, gy, gz), and the main components (>10%) of the wavefunction for each *mJ* state of the ground-state multiplet 6H15/2 for the **Dy(1)** in **Dy2**, at the CASSCF level.

| ***ab initio energy* (cm–1)** | ***gx*** | ***gy*** | ***gz*** | ***Wavefunction*** |
| --- | --- | --- | --- | --- |
| 0 | 0.00332 | 0.00505 | 19.66075 | 96.4% ±15/2 |
| 179.707 | 0.17737 | 0.23156 | 16.76134 | 79.2% ±13/2 + 13.4% ±9/2 |
| 288.968 | 1.41804 | 1.81768 | 13.01442 | 44.2% ±11/2 + 25.0% ±7/2 + 11.1% ±9/2 + 10.1% ±13/2 |
| 352.918 | 4.77945 | 6.08485 | 8.81968 | 25.1% ±5/2 + 20.6% ±1/2 + 16.3% ±3/2 + 14.4% ±11/2 + 13.5% ±9/2 |
| 398.794 | 0.24508 | 2.077 | 12.82739 | 27.9% ±3/2 + 25.5% ±1/2 + 15.0% ±5/2 + 14.2% ±9/2 |
| 444.23 | 0.84528 | 0.94639 | 17.59626 | 26.6% ±7/2 + 26.0% ±5/2 + 18.8% ±9/2 + 14.1% ±3/2 |
| 471.741 | 0.11785 | 0.21777 | 18.9505 | 45.4% ±1/2 + 31.6% ±3/2 + 12.8% ±5/2 |
| 583.877 | 0.00268 | 0.00548 | 19.67684 | 25.9% ±7/2 + 25.8% ±9/2 + 16.5% ±5/2 + 15.3% ±11/2 |

**Table 7.** Crystal field Hamiltonian is given as , and the extended Stevens operator coefficients are extracted from CASSCF calculations for **Dy3** system.

|  |  |  |
| --- | --- | --- |
| *k* | *q* | **Dy** |
| 2 | -2 | -1.19666 |
| 2 | -1 | -2.24162 |
| 2 | 0 | -0.0587 |
| 2 | 1 | 5.25765 |
| 2 | 2 | -2.29151 |
| 4 | -4 | -5.32023 |
| 4 | -3 | -2.60953 |
| 4 | -2 | -4.90206 |
| 4 | -1 | 0.88142 |
| 4 | 0 | -2.70179 |
| 4 | 1 | -9.45501E-4 |
| 4 | 2 | 0.01014 |
| 4 | 3 | 0.03088 |
| 4 | 4 | -0.08181 |
| 6 | -6 | -0.02599 |
| 6 | -5 | -0.01015 |
| 6 | -4 | 0.0037 |
| 6 | -3 | 0.01308 |
| 6 | -2 | -0.00518 |
| 6 | -1 | -0.03468 |
| 6 | 0 | 0.00796 |
| 6 | 1 | 0.05107 |
| 6 | 2 | -5.03022E-4 |
| 6 | 3 | -0.17276 |
| 6 | 4 | -0.00359 |
| 6 | 5 | 0.16999 |
| 6 | 6 | -0.0084 |

**Supplementary References**

1 Pearl, I. A. & Beyer, D. L. Reactions of Vanillin and its Derived Compounds. XXV. Hydrazides of Vanillic and Related Acids. *J. Am. Chem. Soc.* **77**, 3660-3662 (1955). <https://doi.org/10.1021/ja01618a078>

2 Pinsky, M. & Avnir, D. Continuous Symmetry Measures. 5. The Classical Polyhedra. *Inorg. Chem.* **37**, 5575-5582 (1998). <https://doi.org/10.1021/ic9804925>

3 Casanova, D. *et al.* Minimal Distortion Pathways in Polyhedral Rearrangements. *J. Am. Chem. Soc.* **126**, 1755-1763 (2004). <https://doi.org/10.1021/ja036479n>

4 Casanova, D., Llunell, M., Alemany, P. & Alvarez, S. The Rich Stereochemistry of Eight-Vertex Polyhedra: A Continuous Shape Measures Study. *Chem. Eur. J.* **11**, 1479-1494 (2005). <https://doi.org/10.1002/chem.200400799>

5 Sheldrick, G. M. SHELXT - Integrated space-group and crystal-structure determination. *Acta Cryst. A* **71**, 3-8 (2015). <https://doi.org/10.1107/s2053273314026370>

6 Sheldrick, G. M. A short history of SHELX. *Acta Cryst. A* **64**, 112-122 (2008). <https://doi.org/10.1107/s0108767307043930>

7 Dolomanov, O. V., Bourhis, L. J., Gildea, R. J., Howard, J. A. K. & Puschmann, H. OLEX2: a complete structure solution, refinement and analysis program. *J. Appl. Crystallogr.* **42**, 339-341 (2009). <https://doi.org/10.1107/s0021889808042726>

8 Bain, G. A. & Berry, J. F. Diamagnetic Corrections and Pascal's Constants. *J. Chem. Educ.* **85**, 532-536 (2008). <https://doi.org/10.1021/ed085p532>

9 Guo, Y.-N. *et al.* Two-Step Relaxation in a Linear Tetranuclear Dysprosium(III) Aggregate Showing Single-Molecule Magnet Behavior. *J. Am. Chem. Soc.* **132**, 8538-8539 (2010). <https://doi.org/10.1021/ja103018m>

10 Reta, D. & Chilton, N. F. Uncertainty estimates for magnetic relaxation times and magnetic relaxation parameters. *Phys. Chem. Chem. Phys.* **21**, 23567-23575 (2019). <https://doi.org/10.1039/C9CP04301B>

11 Blackmore, W. J. A. *et al.* Characterisation of magnetic relaxation on extremely long timescales. *Phys. Chem. Chem. Phys.* **25**, 16735-16744 (2023). <https://doi.org/10.1039/D3CP01278F>

12 Cole, K. S. & Cole, R. H. Dispersion and Absorption in Dielectrics I. Alternating Current Characteristics. *J. Chem. Phys.* **9**, 341-351 (1941). <https://doi.org/10.1063/1.1750906>

13 Li Manni, G. *et al.* The OpenMolcas Web: A Community-Driven Approach to Advancing Computational Chemistry. *Journal of Chemical Theory and Computation* **19**, 6933-6991 (2023). <https://doi.org/10.1021/acs.jctc.3c00182>

14 Fdez. Galván, I. *et al.* OpenMolcas: From Source Code to Insight. *Journal of Chemical Theory and Computation* **15**, 5925-5964 (2019). <https://doi.org/10.1021/acs.jctc.9b00532>

15 Roos, B. O. & Malmqvist, P.-Å. in *A Tribute Volume in Honor of Professor Osvaldo Goscinski* *Advances in Quantum Chemistry* 37-49 (2004).

16 Zobel, J. P., Widmark, P. O. & Veryazov, V. The ANO-R Basis Set. *J Chem Theory Comput* **16**, 278-294 (2020). <https://doi.org/10.1021/acs.jctc.9b00873>

17 Malmqvist, P. Å., Roos, B. O. & Schimmelpfennig, B. The restricted active space (RAS) state interaction approach with spin–orbit coupling. *Chem. Phys. Lett.* **357**, 230-240 (2002). <https://doi.org/10.1016/s0009-2614(02)00498-0>

18 Chibotaru, L. F. & Ungur, L. Ab initio calculation of anisotropic magnetic properties of complexes. I. Unique definition of pseudospin Hamiltonians and their derivation. *J. Chem. Phys.* **137**, 064112 (2012). <https://doi.org/10.1063/1.4739763>

19 Ungur, L. & Chibotaru, L. F. Ab Initio Crystal Field for Lanthanides. *Chem-Eur J* **23**, 3708-3718 (2017). <https://doi.org/10.1002/chem.201605102>
